# Supplementary material for: Myotis rufoniger genome sequence and analyses: M. rufoniger’s genomic feature and the decreasing effective population size of Myotis bats
Source: PubMed Central journal article supplement (PMC5498047; doi:10.1371/journal.pone.0180418), 2017-07-05

# 17-mer estimation of genome size

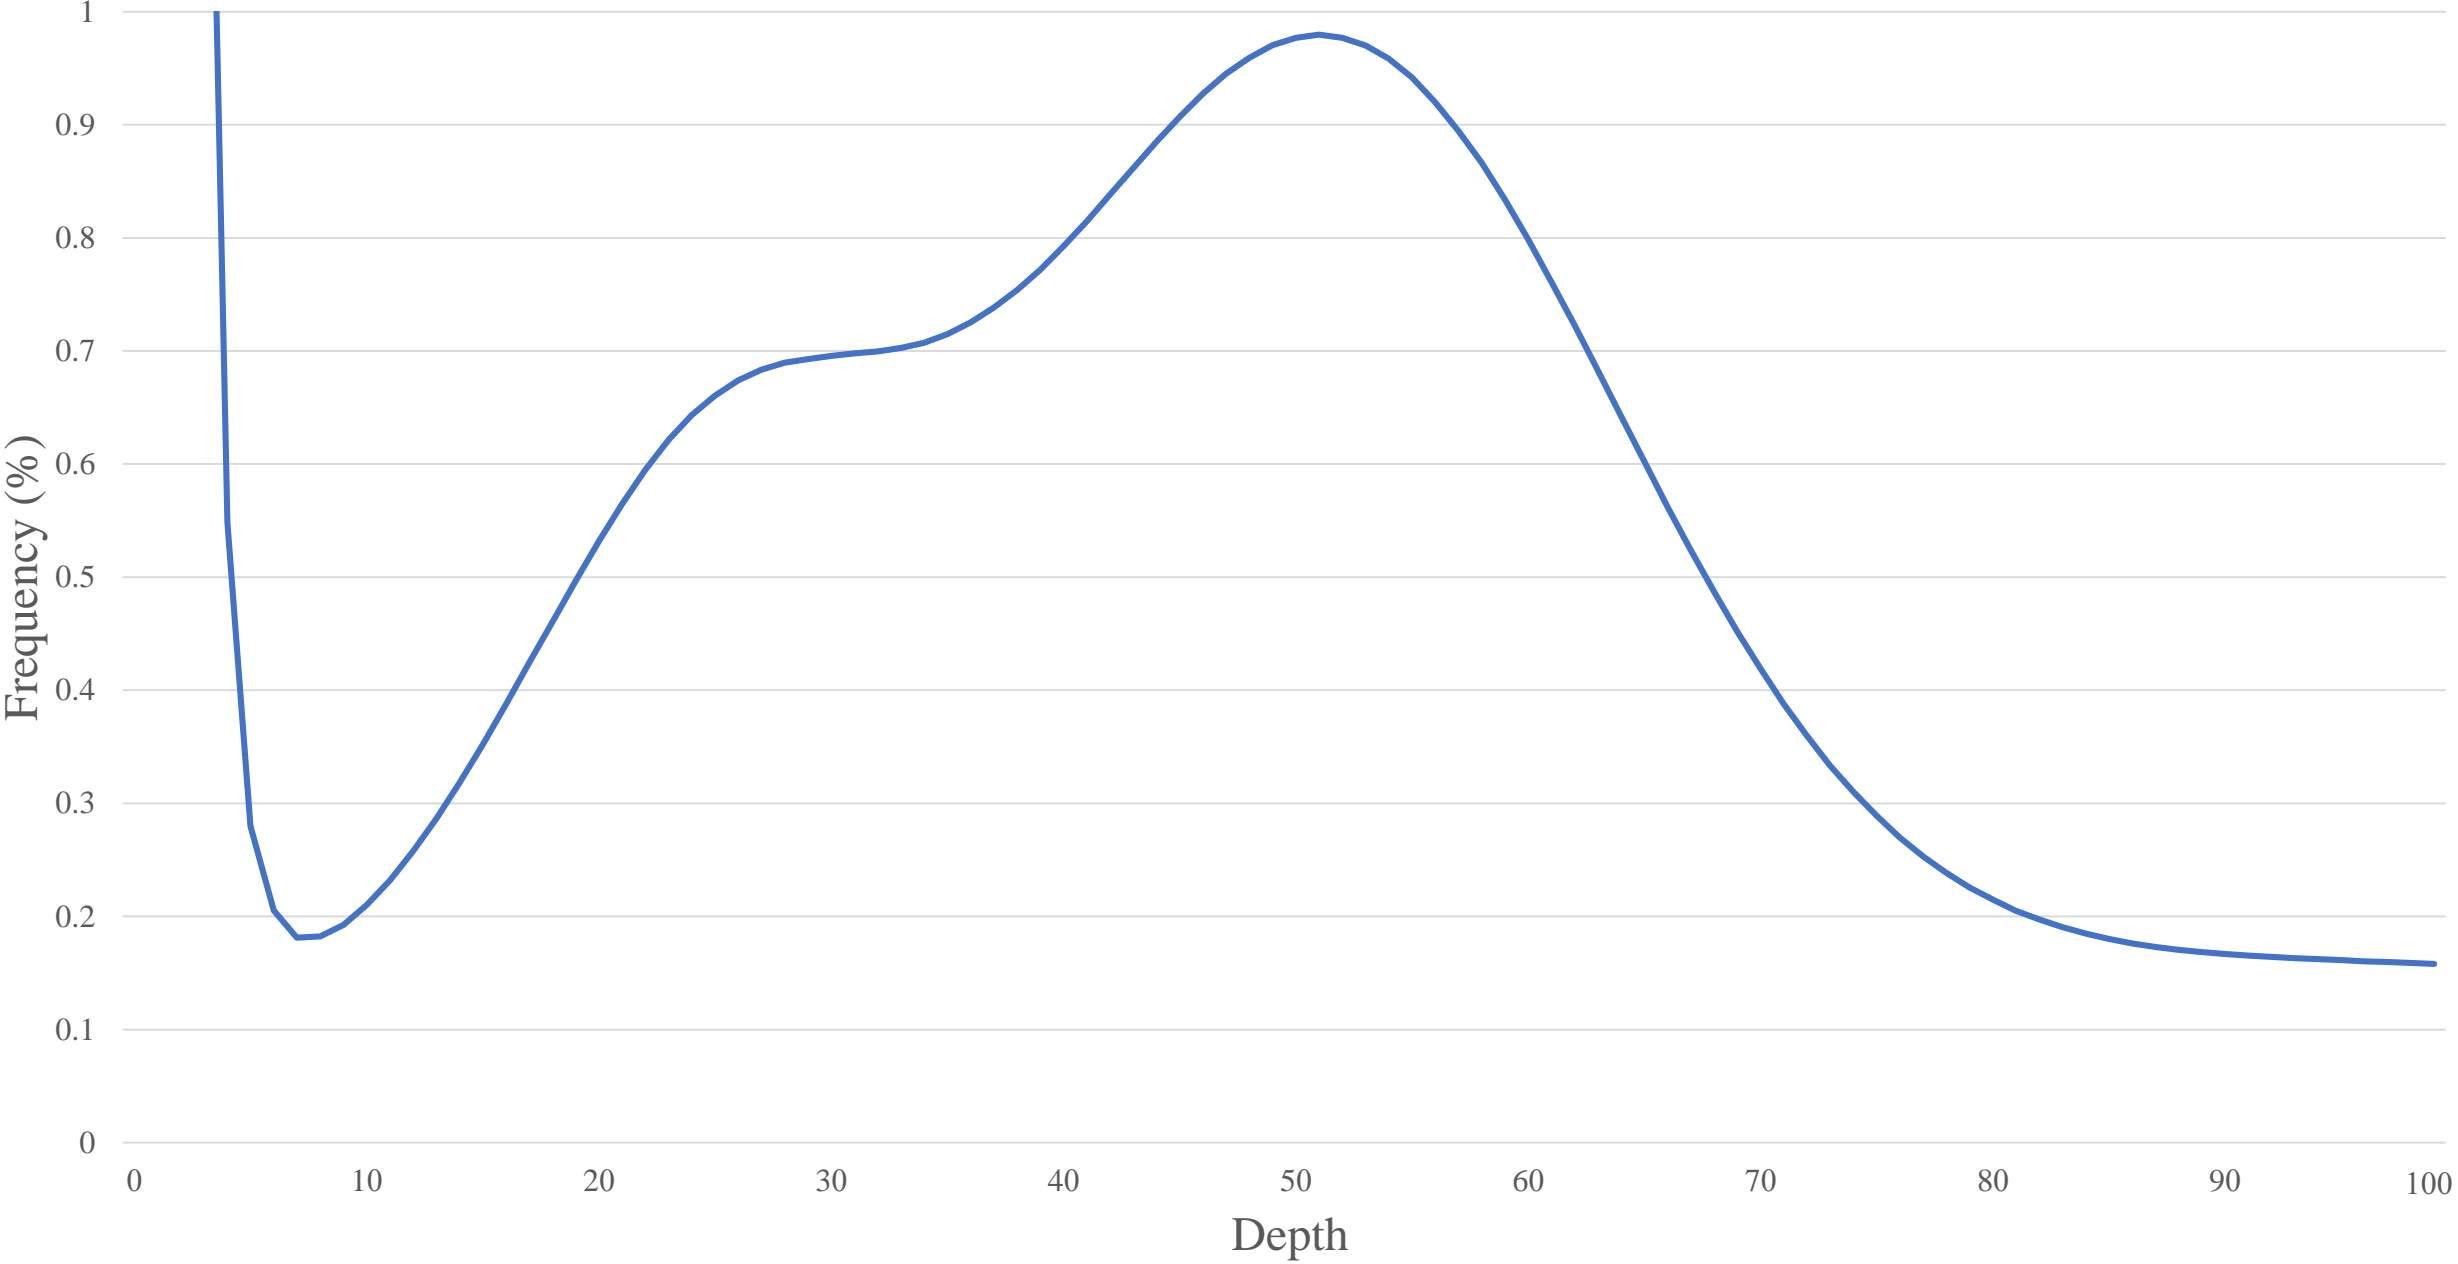

Supplement: pone.0180418.s004.pdf [file pone.0180418.s004.pdf]
