# Supplementary material for: Myotis rufoniger genome sequence and analyses: M. rufoniger’s genomic feature and the decreasing effective population size of Myotis bats
Source: PubMed Central journal article supplement (PMC5498047; doi:10.1371/journal.pone.0180418), 2017-07-05
Supplement: pone.0180418.s005.pdf [file pone.0180418.s005.pdf]

(A)

*FSHB*

|                       |                                                      |     |
|-----------------------|------------------------------------------------------|-----|
| <i>M. rufoniger</i>   | RVPGCAHHADSXYMYPVATECHCGKCNRDSTDCTVQGLGPSYCSFSEIKE   | 129 |
| <i>M. davidii</i>     | RVPGCAHHADSVYTYPIATECHCGKCNRDSTDCTVQGLGPSYCSFSEIKE   |     |
| <i>M. brandtii</i>    | RVPGCAHHADSIYTYPVATECHCGKCNRDSTDCTVQGLGPSYCSFSEIKE   |     |
| <i>M. lucifugus</i>   | RVPGCAHHADSVYTYPVATECHCGKCNRDSTDCTVQGLGPSYCSFSEIKE   |     |
| <i>E. fuscus</i>      | RVPGCAHQADSVYTYPVATECHCGKCNRDSTDCTVQGLGPSYCSFSEIKE   |     |
| <i>P. alecto</i>      | KVPGCAHHANSLYAYPVATECHCGKCDSDNTDCTVRGLGPSYCSFSEMKE   |     |
| <i>P. vampyrus</i>    | KVPGCAHHANSLYAYPVATECHCGKCDSDNTDCTVRGLGPSYCSFSEMKE   |     |
| <i>R. aegyptiacus</i> | KVPGCAHHANSLYAYPVATECHCGKCDSDNTDCTVRGLGPSYCSFSEMKE   |     |
| <i>B. taurus</i>      | KVPGCAHHADSLYTYPVATECHCSKCDSDSTDCTVRGLGPSYCSFREIKE   |     |
| <i>E. caballus</i>    | KVPGCAHHADSLYTYPVATAACHCGKCNDSSTDCTVRGLGPSYCSFGDMKE  |     |
| <i>M. musculus</i>    | RLPGCARHSDSLYTYPVATECHCGKCDSDSTDCTVRGLGPSYCSFSEMKE   |     |
| <i>H. glaber</i>      | RVPGCAHHADSLYTYPVATKCHCGKCDSDSTDCTVRGLGPSYCSFSEMA-   |     |
| <i>H. sapiens</i>     | RVPGCAHHADSLYTYPVATQCHCGKCDSDSTDCTVRGLGPSYCSFGEMKE   |     |
| <i>M. domestica</i>   | SLPGCANQADSLYSYPVATAACHCGSCDSTDSTDCTVRGLGPSYCSFNERKE |     |

(B)

*GHR*

|                       |                                                      |     |
|-----------------------|------------------------------------------------------|-----|
| <i>M. rufoniger</i>   | QMSVPCEEDFRFPWFLIIIFGMFGLTVI-FLFMFSKQQR IKMLILPPVP   | 301 |
| <i>M. davidii</i>     | QMSVPCEEDFRFPWFLIVIFGMFGLTVI-FLFMFSKQQR IKMLILPPVP   |     |
| <i>M. brandtii</i>    | QMSVPCEEDFRFPWFLIIIFGMFGLTVI-FLFVFSKQQR IKMLLLPPVP   |     |
| <i>M. lucifugus</i>   | YEILFSCVSDFRFPWFLIIIFGMFGLTVI-FLFMFSKQQR IKMLLLPPVP  |     |
| <i>E. fuscus</i>      | QMSVPCEEDFQFPWFLIIIFGMFGLTVI-FLFMFSKQQR IKMLILPPVP   |     |
| <i>P. alecto</i>      | QMSPLACEEDFRFPWFLIIIFGIFGLTVILFLFIFSKQQR IKMLILPPVP  |     |
| <i>P. vampyrus</i>    | QMSPLACEEDFRFPWFLIIIVGIFGLTVILFLFIFSKQQR IKMLILPPVP  |     |
| <i>R. aegyptiacus</i> | QMSPLACEEDFRFPWFLIIIFGIFGLTVILFLFIFSKQQR IKMLILPPVP  |     |
| <i>B. taurus</i>      | QMNPSACEEDFQFPWFLIIIFGILGLAVTLYLLIFSKQQR IKMLILPPVP  |     |
| <i>E. caballus</i>    | QMSPLACEEDFQFPWFLIIILGIFGLTVILFLFIFSKQQR IKMLILPPVP  |     |
| <i>M. musculus</i>    | --ILEACEEDIQFPWFLIIIFGIFGVAVMLFVVIFSKQQR IKMLILPPVP  |     |
| <i>H. glaber</i>      | QLSSFTCEEEFQFPWFLIIMIFGIFGLMVMLLVVIFSKQQR IKMLILPPVP |     |
| <i>H. sapiens</i>     | QMSQFTCEEDFYFPWLLIIIFGIFGLTVMLFVFLFSKQQR IKMLILPPVP  |     |
| <i>M. domestica</i>   | S-ECEEKINDFRFPWFLIIIFGILGLTVVLFVFLSKQQR IKLLILPPVP   |     |

(C)

*IGF1R*

|                       |                                                                                               |     |
|-----------------------|-----------------------------------------------------------------------------------------------|-----|
| <i>M. rufoniger</i>   | AAYD <b>S</b> HAHLVIALP <b>I</b> IVLTVLGLAL <b>T</b> LYI IHRKR - -N <b>R</b> MGN <b>G</b> VLY | 974 |
| <i>M. davidii</i>     | AAYD <b>S</b> HAHLVIALP <b>I</b> IVLTVLGLAL <b>T</b> LYI IHRKR - -N <b>R</b> MGN <b>G</b> VLY |     |
| <i>M. brandtii</i>    | AAYD <b>S</b> HAHLVIALP <b>I</b> IVLTVLGLAL <b>T</b> LYV IHRKR - -N <b>R</b> MGN <b>G</b> VLY |     |
| <i>M. lucifugus</i>   | AAFD <b>S</b> HAHLVIALP <b>I</b> IVLTVLGLAL <b>T</b> LYI IHRKR - -N <b>R</b> MGN <b>G</b> VLY |     |
| <i>E. fuscus</i>      | AAMD <b>N</b> YAHLVIALP <b>I</b> IVLIVCGLA <b>V</b> TLYI IHRKR - -N <b>R</b> MGN <b>G</b> VLY |     |
| <i>P. alecto</i>      | TTYENFMHLI IALP <b>I</b> AILLIVGGLVIMLYVFHRKRNSNRLGNGVLY                                      |     |
| <i>P. vampyrus</i>    | TTYENFMHLI IALP <b>I</b> AILLIVGGLVIMLYVFHRKRNSNRLGNGVLY                                      |     |
| <i>R. aegyptiacus</i> | ATYENF <b>T</b> HLVIALP <b>V</b> AILLIVAGLVIMLYVFHRKRNSNRLGNGVLY                              |     |
| <i>B. taurus</i>      | TTYENFIHLMIALP <b>I</b> AVLLIVGGLVIMLYVFHRKRNS <b>S</b> RLGNGVLY                              |     |
| <i>E. caballus</i>    | TTYENFIHLI IALP <b>V</b> AVLLIVGGLVIMLYVFHRKRNS <b>S</b> RLGNGVLY                             |     |
| <i>M. musculus</i>    | TTYENFMHLI IALP <b>V</b> AILLIVGGLVIMLYVFHRKRNS <b>S</b> RLGNGVLY                             |     |
| <i>H. glaber</i>      | TTYENFIHLI IALP <b>V</b> AILLIVGGLVIMLYVFHRKRNS <b>S</b> RLGNGVLY                             |     |
| <i>H. sapiens</i>     | TGYENFIHLI IALP <b>V</b> AVLLIVGGLVIMLYVFHRKRNS <b>S</b> RLGNGVLY                             |     |
| <i>M. domestica</i>   | QDYENFLHLMIALP <b>I</b> AGLFIVGGLLIMWYVF <b>N</b> KKRNSDRLGNGVLY                              |     |

(D)

*TP53*

|                       |                                          |     |
|-----------------------|------------------------------------------|-----|
| <i>M. rufoniger</i>   | ALPTNTDSSPP-PKXPVDXEXFTLQIRGRERFETFRLNE  | 378 |
| <i>M. davidii</i>     | ALPTNTDSSPP-PKKPADEEYFTLQIRGRERFETFRLNE  |     |
| <i>M. brandtii</i>    | ALPTNTDPSPP-PKKPADEEYFTLQIRGRERFETFRLNE  |     |
| <i>M. lucifugus</i>   | ALPTNTDPSPP-PKKPADEEYFTLQIRGRERFETFRLNE  |     |
| <i>E. fuscus</i>      | ALPTDSDSSPP-PKMPVDGEYFTLQIRGRARFEMFRELNE |     |
| <i>P. alecto</i>      | ALPTDTSSSSPKMPPLDEEYFTLQIRGRKNFEILRELNE  |     |
| <i>P. vampyrus</i>    | ALPTDTSSSSPKMPPLDEEYFTLQIRGRKNFEILRELKE  |     |
| <i>R. aegyptiacus</i> | ALPTNTTSSSPKMPPLDEEYFTLQIRGRKNFEMLRELNE  |     |
| <i>B. taurus</i>      | ALPTNTSSSPQPKKPLDGEYFTLQIRGFKRYEMFRELND  |     |
| <i>E. caballus</i>    | VLSSNTSSSPQPKKPLDGEYFTLQIRGRERFEMFRELNE  |     |
| <i>M. musculus</i>    | ALPTCTSASPPQPKKPLDGEYFTLKIRGRKRFEMFRELNE |     |
| <i>H. glaber</i>      | ALPTGTNSSPQPKKPLDGEYFTLKIRGRERFEMFRELNE  |     |
| <i>H. sapiens</i>     | ALPNNTSSSPQPKKPLDGEYFTLQIRGRERFEMFRELNE  |     |
| <i>M. domestica</i>   | ALPTTPGSTPKAKKKLVEGEYFTLQIRGRQRYELLREINE |     |

(E)

*MDM2*

|                       |                                                                                                                                                  |     |
|-----------------------|--------------------------------------------------------------------------------------------------------------------------------------------------|-----|
| <i>M. rufoniger</i>   | ENSDEL <del>S</del> GERQ <del>R</del> K <del>R</del> H <del>R</del> S <del>D</del> S <del>I</del> S <del>F</del> SFDESLALCVIREIRCER              | 210 |
| <i>M. davidii</i>     | ENSDEL <del>S</del> GERQ <del>R</del> K <del>R</del> H <del>R</del> S <del>D</del> S <del>I</del> S <del>F</del> SFDESLALCVIREIRCER              |     |
| <i>M. brandtii</i>    | ENSDEL <del>S</del> GERQ <del>R</del> K <del>R</del> H <del>R</del> S <del>D</del> S <del>I</del> S <del>F</del> SFDESLALCVIREIRCER              |     |
| <i>M. lucifugus</i>   | ENSDEL <del>S</del> GERQ <del>R</del> K <del>R</del> H <del>R</del> S <del>D</del> S <del>I</del> S <del>F</del> SFDESLALCVIREIRCER              |     |
| <i>E. fuscus</i>      | GNSDEL <del>S</del> CERQ <del>R</del> K <del>R</del> H <del>R</del> S <del>D</del> S <del>I</del> S <del>F</del> SFDESLALCVIREIRCER              |     |
| <i>P. alecto</i>      | DNSDEL <del>P</del> GERQ <del>R</del> K <del>R</del> H <del>K</del> S <del>D</del> S <del>I</del> S <del>F</del> SFDESLALCVIREIRCER              |     |
| <i>P. vampyrus</i>    | DNSDEL <del>P</del> GERQ <del>R</del> K <del>R</del> H <del>K</del> S <del>D</del> S <del>I</del> S <del>F</del> SFDESLALCVIREIRCER              |     |
| <i>R. aegyptiacus</i> | DNSDEL <del>P</del> GERQ <del>R</del> K <del>R</del> H <del>K</del> S <del>D</del> S <del>I</del> S <del>F</del> SFDENLALCVIREIRCER              |     |
| <i>B. taurus</i>      | ENSDEL <del>P</del> GERQ <del>R</del> K <del>R</del> H <del>K</del> SDNI <del>S</del> LSFDESLALCVIREICCER                                        |     |
| <i>E. caballus</i>    | ENSDEL <del>P</del> GERQ <del>R</del> K <del>R</del> H <del>K</del> SDSV <del>S</del> LSFDEGLALCVIREICCDG                                        |     |
| <i>M. musculus</i>    | ENTDEL <del>P</del> GERH <del>R</del> K <del>R</del> R <del>R</del> R- - - -SLSFDPSLGLCELREMCSSG                                                 |     |
| <i>H. glaber</i>      | ENSDEL <del>S</del> GERQ <del>R</del> K <del>R</del> H <del>K</del> S <del>D</del> S <del>I</del> S <del>L</del> SFDESLALCVIRELCCER              |     |
| <i>H. sapiens</i>     | ENSDEL <del>S</del> GERQ <del>R</del> K <del>R</del> H <del>K</del> S <del>D</del> S <del>I</del> S <del>L</del> SFDESLALCVIREICCER              |     |
| <i>M. domestica</i>   | ENLDEL <del>P</del> GERH <del>R</del> K <del>R</del> H <del>K</del> S <del>D</del> S <del>I</del> S <del>L</del> PFDESCALCVI <del>S</del> EICCER |     |

(F)

*SLC45A2*

|                       |                                                     |     |
|-----------------------|-----------------------------------------------------|-----|
| <i>M. rufoniger</i>   | YRCLCISHLIGWTAFLSNMLFFTFDMGRIVYHGPNPYSAHNSTEFLIYERG | 214 |
| <i>M. davidii</i>     | YRCLCISHLIGWTAFLSNMLFFTFDMGRIVYHGPNPYSAHNSTEFLIYERG |     |
| <i>M. brandtii</i>    | YRCLCISHLIGWTAFLSNMLFFTFDMGRIVYHGPNPYSAHNSTEFLIYERG |     |
| <i>M. lucifugus</i>   | YRCLCISHLIGWTAFLSNMLFFTFDMGRIVYHGPNPYSAHNSTEFLIYERG |     |
| <i>E. fuscus</i>      | YRCLCISHLIGWTAFLSNMLFFTFDMGRIVYHGPNPYSAHNSTEFLIYERG |     |
| <i>P. alecto</i>      | HRCLCISHLIGWTAFLCNMLFFTFDMGQIVYHGDPYSAHNSTEFLIYERG  |     |
| <i>P. vampyrus</i>    | YRYLCISHLIGWTAFLCSMLFFTFDMGQIVYHGDPYSAHNSTEFLIYERG  |     |
| <i>R. aegyptiacus</i> | YRCLCISHLIGWTAFLSNMLFFTFDMGQIVYHGDPYSAHNSTEFLIYERG  |     |
| <i>B. taurus</i>      | YRCLCISHLIGWTAFLSNMLFFTFDMGQIVYHGDPYGAHNSTEFLIYQRG  |     |
| <i>E. caballus</i>    | YRYLCISHLIGWTAFLSNMLFFTFDMGQIVYHGDPYSAHNSTEFLIYQRG  |     |
| <i>M. musculus</i>    | YRCLCVSHLIGWTAFLSNMLFFTFDMGQIVYHGDPYGAHNSTEFLIYERG  |     |
| <i>H. glaber</i>      | YRCLCISHLIGWTAFLSNMLFFTFDMGQIVYRGDPYSAHNSTEFLIYERG  |     |
| <i>H. sapiens</i>     | YRYLCISHLIGWTAFLSNMLFFTFDMGQIVYRGDPYSAHNSTEFLIYERG  |     |
| <i>M. domestica</i>   | YRYLCVSHLIGWTAFLSNMLFFTFDMGQIVYHGDPYAPHNSTSFLIYERG  |     |

(G)

*RGS7BP*

|                       |                                                     |     |
|-----------------------|-----------------------------------------------------|-----|
| <i>M. rufoniger</i>   | TRTKGCEMARQAHQKLAAI SGPEGGE IHPEICRLYIQLQCCEMYTTEML | 140 |
| <i>M. davidii</i>     | -----MISCLPPLYQHPLP                                 |     |
| <i>M. brandtii</i>    | TRTKGCEMARQAHQKLAAI SGPEGGE IHPEICRLYIQLQCCEMYTTEML |     |
| <i>M. lucifugus</i>   | TRTKGCEMARQAHQKLAAI SGPEGGE IHPEICRLYIQLQCCEMYTTEML |     |
| <i>E. fuscus</i>      | TRTKGCEMARQAHQKLAAI SGPEGGE IHPEICRLYIQLQCCEMYTTEML |     |
| <i>P. alecto</i>      | TRTKGCEMARQAHQKLAAI SGPEDGE IHPEICRLYIQLQCCEMYTTEML |     |
| <i>P. vampyrus</i>    | TRTKGCEMARQAHQKLAAI SGPEDGE IHPEICRLYIQLQCCEMYTTEML |     |
| <i>R. aegyptiacus</i> | TRTKGCEMARQAHQKLAAI SGPEDGE IHPEICRLYIQLQCCEMYTTEML |     |
| <i>B. taurus</i>      | TRTKGCEMARQAHQKLAAI SGPEDGE IHPEICRLYIQLQCCEMYTTEML |     |
| <i>E. caballus</i>    | TRTKGCEMARQAHQKLAAI SGPEDGE IHPEICRLYIQLQCCEMYATEML |     |
| <i>M. musculus</i>    | TRTKGCEMARQAHQKLAAI SGPEDGE IHPEICRLYIQLQCCEMYTTEML |     |
| <i>H. glaber</i>      | TRTKGCEMARQAHQKLAAI SGPEDGE IHPEICRLYIQLQCCEMYTTEML |     |
| <i>H. sapiens</i>     | TRTKGCEMARQAHQKLAAI SGPEDGE IHPEICRLYIQLQCCEMYTTEML |     |
| <i>M. domestica</i>   | TRTKGCEMARQAHQKLAAI SGPEDGE IHPEICRLYIQLQCCEMYTTEML |     |

(H)

*RHO*

|                       |                                                      |     |
|-----------------------|------------------------------------------------------|-----|
| <i>M. rufoniger</i>   | PLNYILLNLAVANLFMVFGGFTTTLYTSMHGYFVFGATGCNLEGGFFATLG  | 120 |
| <i>M. davidii</i>     | PLNYILLNLAVANLFMVFGGFTTTLYTSMHGYFVFGATGCNLEGGFFATLG  |     |
| <i>M. brandtii</i>    | PLNYILLNLAVANLFMVFGGFTTTLYTSMHGYFVFGATGCNLEGGFFATLG  |     |
| <i>M. lucifugus</i>   | PLNYILLNLAVANLFMVFGGFTTTLYTSMHGYFVFGATGCNLEGGFFATLG  |     |
| <i>E. fuscus</i>      | PLNYILLNLAVANLFMVFGGFTTTLYTSMHGYFVFGATGCNLEGGFFATLG  |     |
| <i>P. alecto</i>      | PLNYILLNLAVADLFMVFGGFTTTLYTSLHGYFVFGPTGCNLEGGFFATLG  |     |
| <i>P. vampyrus</i>    | -----MRQGSNQSLADCLA                                  |     |
| <i>R. aegyptiacus</i> | PLNYILLNLAVADLFMVFGGFTTTLYTSLHGYFVFGPTGCNLEGGFFATLG  |     |
| <i>B. taurus</i>      | PLNYILLNLAVADLFMVFGGFTTTLYTSLHGYFVFGPTGCNLEGGFFATLG  |     |
| <i>E. caballus</i>    | PLNYILLNLAVADLFMVFGGFTTTLYTSLHGYFVFGPTGCNVEGGFFATLG  |     |
| <i>M. musculus</i>    | PLNYILLNLAVADLFMVFGGFTTTLYTSLHGYFVFGPTGCNLEGGFFATLG  |     |
| <i>H. glaber</i>      | PLNYILLNLAVADLFMVICGFTTTLYTSMHGYFVFGATGCNMEGGFFATLG  |     |
| <i>H. sapiens</i>     | PLNYILLNLAVADLFMVLGGFTSTLYTSLHGYFVFGPTGCNLEGGFFATLG  |     |
| <i>M. domestica</i>   | PLNYILLNLI VADLFMVFGGFTMTLYTSLHGYFVFGPTGCNLEGGFFATLG |     |

|                       |     |                                           |     |
|-----------------------|-----|-------------------------------------------|-----|
| <i>M. rufoniger</i>   | 241 | ATTQKAEKEVTRMVI IMVVAFLICWLPYASVAFYIFTHQG | 280 |
| <i>M. davidii</i>     |     | ATTQKAEKEVTRMVI IMVVAFLICWLPYASVAFYIFTHQG |     |
| <i>M. brandtii</i>    |     | ATTQKAEKEVTRMVI IMVVAFLICWLPYASVAFYIFTHQG |     |
| <i>M. lucifugus</i>   |     | ATTQKAEKEVTRMVI IMVVAFLICWLPYASVAFYIFTHQG |     |
| <i>E. fuscus</i>      |     | ATTQKAEKEVTRMVI IMVVAFLICWLPYASVAFYIFTHQG |     |
| <i>P. alecto</i>      |     | ATTQKAEKEVTRMVI IMVIAFLICWLPYAGVAFYIFTHQG |     |
| <i>P. vampyrus</i>    |     | ATTQKAEKEVTRMVI IMVIAFLICWLPYAGVAFYIFTHQG |     |
| <i>R. aegyptiacus</i> |     | ATTQKAEKEVTRMVI IMVIAFLICWLPYAGVAFYIFTHQG |     |
| <i>B. taurus</i>      |     | ATTQKAEKEVTRMVI IMVIAFLICWLPYAGVAFYIFTHQG |     |
| <i>E. caballus</i>    |     | ATTQKAEKEVTRMVI IMVIAFLICWVPYASVAFYIFTHQG |     |
| <i>M. musculus</i>    |     | ATTQKAEKEVTRMVI IMVIFFLICWLPYASVAFYIFTHQG |     |
| <i>H. glaber</i>      |     | ATTQKAEKEVTRMVI IMVIAFLICWVPYASVAMYIFTHQG |     |
| <i>H. sapiens</i>     |     | ATTQKAEKEVTRMVI IMVIAFLICWVPYASVAFYIFTHQG |     |
| <i>M. domestica</i>   |     | ATTQKAEKEVTRMVI IMVIAFLICWLPYAGVAFYIFTHQG |     |



(I)

*OPN1SW*

|                       |                                                    |    |
|-----------------------|----------------------------------------------------|----|
| <i>M. rufoniger</i>   | PWDGPQYHXAPVWAFHLQAAFMGFVFFAGTPLNATVLVATLRYKKLRQPL | 70 |
| <i>M. davidii</i>     | PWDGPQYHIAPVWAFHLQAAFMGFVFFAGTPLNATVLVATLRYKKLRQPL |    |
| <i>M. brandtii</i>    | PWDGPQYHIAPVWAFHLQAAFMGFVFFAGTPLNATVLVATLRYKKLRQPL |    |
| <i>M. lucifugus</i>   | PWDGPQYHIAPVWAFHLQAAFMGFVFFAGTPLNATVLVATLRYKKLRQPL |    |
| <i>E. fuscus</i>      | PWDGPQYHIAPVWAFHLQAAFMGFVFFAGTPLNATVLVATLRYKKLRQPL |    |
| <i>P. alecto</i>      | PWDGPQHIIAPVWAFHLQAAFMGFVFFVGTPLNATVLVATLRYRKLQRPL |    |
| <i>P. vampyrus</i>    | PWDGPQHIIAPVWAFHLQAAFMGFVFFVGTPLNATVLVATLRYRKLQRPL |    |
| <i>R. aegyptiacus</i> | PWDGPQYHVAPVWAFHLQAAFMGFVFFVGTPLNATVLVATLRYRKLQRLL |    |
| <i>B. taurus</i>      | PWDGPQYHLAPVWAFHLQAAFMGFVFFVGTPLNATVLVATLRYRKLQRPL |    |
| <i>E. caballus</i>    | PWDGPQYHIAPVWAFRLQAAFLGIVFLVGMPLNSLVLVATLRYKKLRQPL |    |
| <i>M. musculus</i>    | PWDGPQYHLAPVWAFRLQAAFMGFVFFVGTPLNAIVLVATLHYKKLRQPL |    |
| <i>H. glaber</i>      | PWDGSQYHIAPIWAFHLQAAFMGLVFFVGTPLNAIVLVATLQYKKLRQPL |    |
| <i>H. sapiens</i>     | PWDGPQYHIAPVWAFYLQAAFMGTVFLIGFPLNAMVLVATLRYKKLRQPL |    |
| <i>M. domestica</i>   | PWDGPQYHIAPAWAFHFQTVFMGFVFCAGTPLNAVVLVATLRYKKLRQPL |    |

|                       |    |                                           |     |
|-----------------------|----|-------------------------------------------|-----|
| <i>M. rufoniger</i>   | 81 | GFLFCIFSFTVFIASCQGYFVFRHVCALAEFLGSTAGL    | 120 |
| <i>M. davidii</i>     |    | GFLFCIFSFTVFIASCQGYFVFRHVCALAEFLGSTAGL    |     |
| <i>M. brandtii</i>    |    | GFLFCIFSFTVFIASCHGYFVFRHVCALAEFLGSTAGL    |     |
| <i>M. lucifugus</i>   |    | GFLFCIFSFTVFIASCQGYFVFRHVCALAEFLGSTAGL    |     |
| <i>E. fuscus</i>      |    | GFLFCIFSFTVFIASCQGYFIFGRHVCALAEFLGSTAGL   |     |
| <i>P. alecto</i>      |    | GFLFCIFSFTVFIASCQGYFVFGPHVCALAEFLGSTAGL   |     |
| <i>P. vampyrus</i>    |    | GFLFCIFSFTVFIASCQGYFVFRHVCALAEFLGSTAG-    |     |
| <i>R. aegyptiacus</i> |    | GFLFCIFSFTVFIASCQGYFVFRHVCALAEFLGSAAGL    |     |
| <i>B. taurus</i>      |    | GFICYIFSFTVFIITSCYGYFVFRHVCALAEFLGCTAGL   |     |
| <i>E. caballus</i>    |    | GFLVCIFSFLIVFINSCHGYFVFGPHVCAFESFLGTAVAGL |     |
| <i>M. musculus</i>    |    | GFLFCIFSFTVFIASCHGYFLFRHVCALAEFLGSAAGL    |     |
| <i>H. glaber</i>      |    | GFLFCIFSFTVFIASCHGYFFFGRHVCALAEFLGSAAGL   |     |
| <i>H. sapiens</i>     |    | GFLLCIFSFPVFAVASCNGYFVFRHVCALAEFLGTAVAGL  |     |
| <i>M. domestica</i>   |    | GFIFCLFAVFTVFISSSQGYFIFGRHVCALAEFLGSAAGL  |     |

(J)

*CNGB3*

|                       |                                                      |     |
|-----------------------|------------------------------------------------------|-----|
| <i>M. rufoniger</i>   | FFEFNHRLESIMNRAYIYRVARTAGCLLFALHVNACIYYWASDHQIGTT    | 430 |
| <i>M. davidii</i>     | FFEFNHHLESIMNRAYIYRVARTAGCLLFALHVNACIYYWASDHQFGST    |     |
| <i>M. brandtii</i>    | FFEFNHCLESIMNRAYIYRVARTAGCLLFALHVNACIYYWASDHQIGTT    |     |
| <i>M. lucifugus</i>   | FFEFNHRLESIMNRAYIYRVARTAGCLLFALHVNACIYYWASNHQIGTT    |     |
| <i>E. fuscus</i>      | FFEFNHRLESIMDKAYIYRVARTAGCLLFALHVNACIYYWASDHQIGTT    |     |
| <i>P. alecto</i>      | FFEFNHRLESAMDKAYVYRVFRTTGYYLLFTLHINACIYYWASAYEGLGTT  |     |
| <i>P. vampyrus</i>    | FFEFNHRLESAMDKAYVYRVFRTTGYYLLFTLHINACIYYWASAYEGLGTT  |     |
| <i>R. aegyptiacus</i> | FFEFNHRLESVMDKAYIYRVLRRTTGYYLLFTLHINACIYYWASAYEGLGTT |     |
| <i>B. taurus</i>      | -----                                                |     |
| <i>E. caballus</i>    | FFEFNHHLESIMDKAYIYRVIRTTGYYLLFTLHINACIYYWASNYEGIGTT  |     |
| <i>M. musculus</i>    | FFEFNHHLESIMDKAYVYRVIRTTGYYLLFLLHINACVYYWASDYEGIGST  |     |
| <i>H. glaber</i>      | FFEFNHHLESIMDKVYIYRVIRTTGYYLLFILHINACIYYWASNYEGIGTT  |     |
| <i>H. sapiens</i>     | FFEFNHHLESIMDKAYIYRVIRTTGYYLLFILHINACVYYWASNYEGIGTT  |     |
| <i>M. domestica</i>   | FFEFNDRLESRMDNAYIYRVIRTTGYYLLFVLHVNACIYSLASDYEGIGST  |     |
