# Supplementary material for: Myotis rufoniger genome sequence and analyses: M. rufoniger’s genomic feature and the decreasing effective population size of Myotis bats
Source: PubMed Central journal article supplement (PMC5498047; doi:10.1371/journal.pone.0180418), 2017-07-05
Supplement: pone.0180418.s006.pdf [file pone.0180418.s006.pdf]

(A)

*DCT*

|                       | 1          |            |            |                 | 50         |
|-----------------------|------------|------------|------------|-----------------|------------|
| <i>M. rufoniger</i>   | --MLKSSSGR | QEEX-----S | IGGESKFPDC | KAMRSLWWGL      | LLSWLGCGML |
| <i>M. davidii</i>     | --MLKSSSGR | QEES-----S | IGGERKFPDC | KAMRSLWWGL      | LLSWLGCGML |
| <i>M. brandtii</i>    | --MLKSSSGR | QEES-----S | KGESKFPDC  | KAMRSLWWGL      | LLSWLGCGML |
| <i>M. lucifugus</i>   | --MLKSSSGR | QEES-----S | IGGESKFPDC | KAMRSLWWGL      | LLSWLGCGML |
| <i>E. fuscus</i>      | -----      | -----      | -----      | --MRSLWWGL      | LLSWLGCGML |
| <i>P. alecto</i>      | -----      | -----      | -----      | --MSPLRWGL      | LLSCLSCGIL |
| <i>P. vampyrus</i>    | -----      | -----      | -----      | --MSPLRWGL      | LLSCLSCGIL |
| <i>R. aegyptiacus</i> | -----      | -----      | -----      | --MGPLLWGL      | LLSCLGCGIL |
| <i>B. taurus</i>      | -----      | -----      | -----      | --MSPLGWGL      | LLGCLGCALP |
| <i>E. caballus</i>    | MNAQEPKSGR | QGERQDRSKE | WKVQESSPGY | KAMSSLRWGL      | LLSCLGCGLL |
| <i>M. musculus</i>    | -----      | -----      | -----      | --MGLVGWGL      | LLGCLGCGIL |
| <i>H. glaber</i>      | -----      | -----      | -----      | --MRPLQWGL      | LLGCLGSCLW |
| <i>H. sapiens</i>     | -----      | -----      | -----      | --MSPLWWGF      | LLSCLGCKIL |
| <i>M. domestica</i>   | -----      | -----      | -----      | -MIK QQQAGLPWWL | TLLCLGSCLL |
|                       | 51         |            |            |                 | 100        |
| <i>M. rufoniger</i>   | PGARAQFPRV | CMTVASLVAK | ECCPPLGVEP | TNVCGSQEGR      | GQCTEVQADT |
| <i>M. davidii</i>     | PGARAQFPRV | CMTVASLVAK | ECCPPLGVEP | ANVCGSQEGR      | GQCTEVQADT |
| <i>M. brandtii</i>    | PGAGAQFPRV | CMTVASLVAK | ECCPPLGVEP | ANICGSQEGR      | GQCTEVQADT |
| <i>M. lucifugus</i>   | PGARAQFPRV | CMTVASLVAK | ECCPPLGVEP | ANVCGSQEGR      | GQCTEVQADT |
| <i>E. fuscus</i>      | PGAWAQFPRV | CMTVASLVAK | ECCPPLGVEP | ANVCGSQEGR      | GQCTEVQADT |
| <i>P. alecto</i>      | PGVWAQFPRV | CMTMDNLVSK | ECCPPLGAEP | GNVCGSQAGR      | GQCTEVQTDI |
| <i>P. vampyrus</i>    | PGVWAQFPRV | CMTMDNLVSK | ECCPPLGVEP | GNVCGSQTGR      | GQCTEVQTDI |
| <i>R. aegyptiacus</i> | PGVWAQFPRV | CMTVDNLVSK | ECCPPLGAEP | DNVCGSRAGR      | GQCTEVQTDI |
| <i>B. taurus</i>      | SGARAQFPRV | CMTVGSLOAK | ECCPPLGADP | ANVCGSREGR      | GQCAEVQTDI |
| <i>E. caballus</i>    | PGAWAQFPRV | CMTVDSLISK | ECCPPLGMEP | ANVCGSQEGR      | GQCTEVETDI |

|              |            |            |            |            |            |
|--------------|------------|------------|------------|------------|------------|
| M. musculus  | LRARAQFPRV | CMTLDGVLNK | ECCPPLGPEA | TNICGFLEGR | GQCAEVQTD  |
| H. glaber    | PGAWAQFPRV | CMTLDSLGRK | ECCPPLGVEP | TNVCQSODGR | GQCLEVRADS |
| H. sapiens   | PGAQQQFPRV | CMTVDSLUNK | ECCPRLGAES | ANVCGSQQGR | GQCTEVRADT |
| M. domestica | PMTWAQFPRT | CMTLESVSK  | ECCPALGVDP | ANRCGMLEGR | GQCAEVQTD  |

Topological domain: Luminal, melanosome

101

150

|                |            |            |            |            |            |
|----------------|------------|------------|------------|------------|------------|
| M. rufoniger   | RPWSGPYVLR | NQDDREWWPR | KFFNRTCNT  | GNFAGFNCGD | CKFGWTGPNC |
| M. davidii     | RPWSGPYVLR | NQDDRERWPR | KFFNRTCNT  | GNFAGFNCGD | CKFGWTGPNC |
| M. brandtii    | RPWSGPYVLR | NQDDRERWPR | KFFNRTCNT  | GNFAGFNCGD | CKFGWTGPNC |
| M. lucifugus   | RPWSGPYVLR | NQDDRERWPR | KFFNRTCNT  | GNFAGFNCGD | CKFGWTGPNC |
| E. fuscus      | RPWSGPYVLR | NQDDRERWPR | KFFNRTCNT  | GNFAGFNCGD | CKFGWTGPNC |
| P. alecto      | RPWGGPYVLR | NQDDRERWPR | KFFNRTCNT  | GNFAGYNCGG | CKFGWIGLNC |
| P. vampyrus    | RPWGGPYVLR | NQDDRERWPR | KFFNRTCNT  | GNFAGYNCGG | CKFGWIGLNC |
| R. aegyptiacus | RPWGGPYVLR | NQDDRERWPR | KFFNRTCNT  | GNFAGYNCGG | CKFGWIGLNC |
| B. taurus      | RPWSGPYVLR | NQDDRERWPR | KFFDRTCCT  | GNFAGYNCGN | CRFGWTGPKC |
| E. caballus    | RPWSGPYILR | NQDDRERWPR | KFFDWTCKCT | GNFAGYNCGD | CKFGWTGPNC |
| M. musculus    | RPWSGPYILR | NQDDREQWPR | KFFNRTCCT  | GNFAGYNCGG | CKFGWTGPDC |
| H. glaber      | RPWSGPYVLR | NRDDREQWPR | KFFHRTCCT  | GNFAGYHCGD | CRFGWTGPNC |
| H. sapiens     | RPWSGPYILR | NQDDRELWPR | KFFHRTCCT  | GNFAGYNCGD | CKFGWTGPNC |
| M. domestica   | RPWSGPYVLR | NQDDREQWPR | KFFNRTCCT  | GNFAGYNCGD | CKFGWTGPDC |

Topological domain: Luminal, melanosome

151

200

|                |            |            |            |            |            |
|----------------|------------|------------|------------|------------|------------|
| M. rufoniger   | DQKKPPVIRK | NIHFLTPQER | EQFLGALDLA | KNTTHPDYVI | TTQHWLGLLG |
| M. davidii     | DQKKPPVIRK | NIHFLTPQER | EQFLGALDLA | KNTTHPDYVI | TTQHWLGLLG |
| M. brandtii    | DQKKPPVIRK | NIHFLTPQER | EQFLGALDLA | KNTTHPDYVI | TTQHWLGLLG |
| M. lucifugus   | DQKKPPVIRK | NIHFLTPQER | EQFLGALDLA | KNTTHPDYVI | TTQHWLGLLG |
| E. fuscus      | DQKKPPVIRK | NIHFLTPQER | EQFLGALDLA | KNTTHPDYVI | TTQHWLGLLG |
| P. alecto      | DRKKPPVVRQ | NIHSLTPQER | EQFLGALDLA | KKTIHPDYVI | TTQHWLGLLG |
| P. vampyrus    | DRKKPPVVRQ | NIHSLTPQER | EQFLGALDLA | KKTIHPDYVI | TTQHWLGLLG |
| R. aegyptiacus | DRKKPPVVRQ | NIHSLTPQER | EQFLGALDLA | KKTIHPDYVI | TTQHWLGLLG |
| B. taurus      | DQKKPLVVR  | DVHSLTPQER | EQFLDALDLA | KYTPHPDYVI | TTQHWLGLLG |

|                     |                                                         |
|---------------------|---------------------------------------------------------|
| <i>E. caballus</i>  | DRKKAPVVRQ NIHSLTPQER EQFLGALDLA KNTTHPDYVI TTQHWLGLLG  |
| <i>M. musculus</i>  | NRKKPAILRR NIHSLTAQER EQFLGALDLA KKSIIHPDYVI TTQHWLGLLG |
| <i>H. glaber</i>    | DQKKPPVVRQ NIHSLTPQER EQFLGALDLA KKTTHPDYVI TTQHWLGLLG  |
| <i>H. sapiens</i>   | ERKKPPVIRQ NIHSLSPQER EQFLGALDLA KKRVHPDYVI TTQHWLGLLG  |
| <i>M. domestica</i> | NQKKPPVVRK NIHSLSPRER EQFLDALDLA KNTIHPDYVI TTQHWLGLLG  |

Topological domain: Lumenal, melanosome

201

250

|                       |                                                       |
|-----------------------|-------------------------------------------------------|
| <i>M. rufoniger</i>   | PNGTQPQIAN CSYDFFVWL HYYSVRDTLL GPGRPYKAID FSHQGPAFVT |
| <i>M. davidii</i>     | PNGTQPQIAN CSYDFFVWL HYYSVRDTLL GPGRPYKAID FSHQGPAFVT |
| <i>M. brandtii</i>    | PNGTQPQIAN CSYDFFVWL HYYSVRDTLL GPGRPYKAID FSHQGPAFVT |
| <i>M. lucifugus</i>   | PNGTQPQIAN CSYDFFVWL HYYSVRDTLL GPGRPYKAID FSHQGPAFVT |
| <i>E. fuscus</i>      | PNGTQPQIAN CSYDFFVWL HYYSVRDTLL GPGRPYKAID FSHQGPAFVT |
| <i>P. alecto</i>      | PNRTQPQIAN CSYDFFVWL HYYSVRDTLL GPGRPYKAID FSHQGPAFVT |
| <i>P. vampyrus</i>    | PNRTQPQIAN CSYDFFVWL HYYSVRDTLL GPGRPYKAID FSHQGPAFVT |
| <i>R. aegyptiacus</i> | PNGTQPQIAN CSYDFFVWL HYYSVRDTLL GPGRPYKAID FSHQGPAFVT |
| <i>B. taurus</i>      | PNGTQPQIAN CSYDFFVWL HYYSVRDTLL GPGRPYKAID FSHQGPAFVT |
| <i>E. caballus</i>    | PNGTQPQIAN CSYDFFVWL HYYSVRDTLL GPGRPYKAID FSHQGPAFVT |
| <i>M. musculus</i>    | PNGTQPQIAN CSYDFFVWL HYYSVRDTLL GPGRPYKAID FSHQGPAFVT |
| <i>H. glaber</i>      | POGTQPQIAN CSYDFFVWL HYYSVRDTLL GPGRPYKAVD FSHQGPAFVT |
| <i>H. sapiens</i>     | PNGTQPQFAN CSYDFFVWL HYYSVRDTLL GPGRPYRAID FSHQGPAFVT |
| <i>M. domestica</i>   | PNGTQPQIAN CSYNYFVWL HYYSVRDTLL GPGRPFKAID FSHQGPAFLT |

Topological domain: Lumenal, melanosome

251

300

|                       |                                                        |
|-----------------------|--------------------------------------------------------|
| <i>M. rufoniger</i>   | WHRYHLLWLE RDLQRLIGNE SFALPYWNFA TGRNECDVCT DQLLGAARQD |
| <i>M. davidii</i>     | WHRYHLLCLE RDLQRLIGNE SFALPYWNFA TGRNECDVCT DQLLGAARQD |
| <i>M. brandtii</i>    | WHRYHLLWLE RDLQRLIGNE SFALPYWNFA TGRNECDVCT DQLLGAARQD |
| <i>M. lucifugus</i>   | WHRYHLLWLE RDLQRLIGNE SFALPYWNFA TGRNECDVCT DQLLGAARQD |
| <i>E. fuscus</i>      | WHRYHLLWLE RDLQRLIGNE SFALPYWNFA TGRNECDVCT DQLFGAARQD |
| <i>P. alecto</i>      | WHRYHLLWLE RDLQRLIGNE SFALPYWNFA TGRNECDVCT DQLFGAARQD |
| <i>P. vampyrus</i>    | WHRYHLLWLE RDLQRLIGNE SFALPYWNFA TGRNECDVCT DQLFGAARQD |
| <i>R. aegyptiacus</i> | WHRYHLLWLE RDLQRLIGNE SFALPYWNFA TGRNECDVCT DQLFGAARQD |

|              |                                                        |
|--------------|--------------------------------------------------------|
| B. taurus    | WHRYHLLWLE RDLQRLTGNE SFALPYWNFA TGRNECDVCT DQLLGAARQD |
| E. caballus  | WHRYHLLWLE RDLQRLTGNE SFALPYWNFA TGRNECDVCT DQLLGAARQD |
| M. musculus  | WHRYHLLWLE RELQRLTGNE SFALPYWNFA TGKNECDVCT DELLGAARQD |
| H. glaber    | WHRYHLLWLE RDLQRLTGNE SFALPYWNFA TGRNECDVCT DQLLGAARQD |
| H. sapiens   | WHRYHLLCLE RDLQRLIGNE SFALPYWNFA TGRNECDVCT DQLFGAARPD |
| M. domestica | WHRYHLLLE RDLQRLTGNE SFALPYWNFA TGKNECDVCT DQLFGASRLE  |

**Topological domain: Lumenal, melanosome**

301

350

|                |                                                        |
|----------------|--------------------------------------------------------|
| M. rufoniger   | DPTLISQNSR FSSWEIVCDS LDDYNHRVTL CNGTYEGLLR RNQAGRNGEK |
| M. davidii     | DPTLISQNSR FSSWEIVCDS LDDYNRRVTL CNGTYEGLLR RNQAGRNGEK |
| M. brandtii    | DPTLISQNSR FSSWEIVCDS LDDYNRRVTL CNGTYEGLLR RNQAGRNGEK |
| M. lucifugus   | DPTLISQNSR FSSWEIVCDS LDDYNRRVTL CNGTYEGLLR RNQAGRNGEK |
| E. fuscus      | DPTLISQNSR FSSWEIVCDS LDDYNRRVTL CNGTYEGLLR RNQAGRNGEK |
| P. alecto      | DPTLISQNSR FSSWEIVCNS LDDYNRRVTL CNGTYEGLLR RNRVGRNSEK |
| P. vampyrus    | DPTLISQNSR FSSWEIVCNS LDDYNRRVTL CNGTYEGLLR RNRVGRNSEK |
| R. aegyptiacus | DPTLISQNSR FSSWEIVCDS LDDYNRRVTL CNGTYEGLLR RNRVGRNSEK |
| B. taurus      | DPTLISQNSR FSSWEIVCDS LDDYNRRVTL CNGTYEGLLK RNQMGRNSEK |
| E. caballus    | DPMLISQNSR FSSWEIVCDS LDDYNRRVTL CNGTYEGLLR RNQVGRNSEK |
| M. musculus    | DPTLISRNSR FSTWEIVCDS LDDYNRRVTL CNGTYEGLLR RNKVGRNNEK |
| H. glaber      | DPTLISQNSR FSSWEIVCDS LDDYNQRVTL CNGTYEGLLR RNQMGRNREK |
| H. sapiens     | DPTLISRNSR FSSWETVCDS LDDYNHLVTL CNGTYEGLLR RNQMGRNSMK |
| M. domestica   | DSALISQNSR FSRWEIVCNS LDDYNRQVTL CNGTNEGLLR RNQLGRTRVQ |

**Topological domain: Lumenal, melanosome**

351

400

|              |                                                        |
|--------------|--------------------------------------------------------|
| M. rufoniger | LPSLKDIEDC LSLKQFDNPP FFQNSTFSFR NALEGFDKAD GTLDSQVMSL |
| M. davidii   | LPSLKDIEDC LSLKQFDNPP FFQNSTFSFR NALEGFDKAD GTLDSQVMSL |
| M. brandtii  | LPSLKDIEGC LSLKQFDNPP FFQNSTFSFR NALEGFDKAD GTLDSQVMSL |
| M. lucifugus | LPSLKDIEGC LSLKQFDNPP FFQNSTFSFR NALEGFDKAD GTLDSQVMSL |
| E. fuscus    | LPSLKDIEDC LSLKKFDNPP FFQNSTFSFR NALEGFDKAD GTLDSQVMSL |
| P. alecto    | LPTLKEIQDC LSLKKFDNPP FFQNSTFSFR NALEGFDKAD GTLDSQAMSL |
| P. vampyrus  | LPTLKEIQDC LSLKKFDNPP FFQNSTFSFR NALEGFDKAD GTLDSQAMSL |

|                |                                                        |
|----------------|--------------------------------------------------------|
| R. aegyptiacus | LPNLKDIQDC LSLTKFDNPP FFQNSTFSFR NALEGFDKAD GTLDSQVMSL |
| B. taurus      | LPTLKDIQNC LSLKKFDSPP FFQNSTLSFR NALEGFGKAD GTLDSQVMNF |
| E. caballus    | LPTLHDIQDC LSLKKFDNPP FFQNSTFSFR NALEGFDKAD GTLDSQVLSL |
| M. musculus    | LPTLKNVQDC LSLQKFDSPP FFQNSTFSFR NALEGFDKAD GTLDSQVMNL |
| H. glaber      | LPTLKDVQDC LSLQKFDNPP FFQNSTFSFR NALEGFDKAD GTLGSQVASL |
| H. sapiens     | LPTLKDIRDC LSLQKFDNPP FFQNSTFSFR NALEGFDKAD GTLDSQVMSL |
| M. domestica   | LPTIEDVQAC LSLEKFDNPP FFRNSSFSFR NALEGFDKAD GTFDSPVMSL |

Topological domain: Lumenal, melanosome

401 450

|                |                                                        |
|----------------|--------------------------------------------------------|
| M. rufoniger   | HNLVHSFLNG TNALPHSAAN DPIFVV-----                      |
| M. davidii     | HNLVHSFLNG TNALPHSAAN DPIFVV-----                      |
| M. brandtii    | HNLVHSFLNG TNALPHSAAN DPIFVV-----                      |
| M. lucifugus   | HNLVHSFLNG TNALPHSAAN DPIFVV-----                      |
| E. fuscus      | HNLVHSFLNG TNALPHSAAN DPIFVV-----                      |
| P. alecto      | HNLVHSFLNG TSALPHSAAN DPIFVV-----                      |
| P. vampyrus    | HNLVHSFLNG TSALPHSAAN DPIFVV-----                      |
| R. aegyptiacus | HNLVHSFLNG TNALPHSAAN DPIFVV-----                      |
| B. taurus      | HNLVHSFLNG TSALPHSAAN DPVFVV-----                      |
| E. caballus    | HNLVHSFLNG TSALPHSAAN DPIFVV-----                      |
| M. musculus    | HNLVHSFLNG TNALPHSAAN DPVFVV-----                      |
| H. glaber      | HNLVHSFLNG TSALPHSAAN DPVFVV-----                      |
| H. sapiens     | HNLVHSFLNG TNALPHSAAN DPIFVVISNR LLYNATTNIL EHVrKEKATK |
| M. domestica   | HNLVHAFVNG TSALPHSAAN DPIFVV-----                      |

Topological domain: Lumenal, melanosome

451 500

|              |                                         |
|--------------|-----------------------------------------|
| M. rufoniger | -----L HAFTDAIFDE WMRRFNPSXD AWPQELAPIG |
| M. davidii   | -----L HAFTDAIFDE WMRRFNPSAD AWPQELAPIG |
| M. brandtii  | -----L HAFTDAIFDE WMRRFNPSAD AWPQELAPIG |
| M. lucifugus | -----L HAFTDAIFDE WMRRFNPSAD AWPQELAPIG |
| E. fuscus    | -----L HAFTDAIFDE WMRRFNPSAD AWPQELAPIG |
| P. alecto    | -----L HSFTDAIFDE WMKRFNPSAN AWPQELAPIG |

*P. vampyrus* -----L HSFTDAIFDE WMKRFNPSAN AWPQELAPIG  
*R. aegyptiacus* -----L HCFTDAIFDE WMKRFNPSVD AWPQELAPIG  
*B. taurus* -----L HSFTDAIFDE WMKRFNPPVD AWPRELAPIG  
*E. caballus* -----L HSFTDAIFDE WMRRFNPPAE AWPQELAPIG  
*M. musculus* -----L HSFTDAIFDE WLKRNNPSTD AWPQELAPIG  
*H. glaber* -----L HSFTDSIFEE WMKRYKPAAD AWPQELAPIG  
*H. sapiens* ELPSLHVLVT MSLGGSTQVL HSFTDAIFDE WMKRFNPPAD AWPQELAPIG  
*M. domestica* -----L HSFTDAIFDE WMKRFNPPVN AWPPELAPIG

**Topological domain: Lumenal, melanosome**

501 550

*M. rufoniger* HNRMHNMVVPF FPSVTNQELF LTADQLGYSY AIDLVP--EE T--PSWSVTL  
*M. davidii* HNRMYNMVVPF FPSVTNQELF LTADQLGYSY AIDLVP--EE T--PSWSVTL  
*M. brandtii* HNRMYNMVVPF FPSVTNQELF LTADQLGYSY AIDLVP--EE T--PSWSVTL  
*M. lucifugus* HNRMYNMVVPF FPSVTNQELF LTADQLGYSY AIDLVP--EE T--PSWSVTL  
*E. fuscus* HNRMYNMVVPF FPSVTNQECF LTTDQLGYSY AIDLPVSVEE T--PSWSTTL  
*P. alecto* HNRMYNMVVPF FPPVTNEEFF LTADQLGYSY VIDLPVSVEE T--PSWNTTL  
*P. vampyrus* HNRMYNMVVPF FPPVTNEEFF LTADQLGYSY VIDLPVSVEE T--PSWNTTL  
*R. aegyptiacus* HNRMYNMVVPF FPPVTNEEFF LTADQLGYSY VIDLPV--EE T--PSWNTTL  
*B. taurus* HNRMYNMVVPF FPPVTNEELF LTADQLGYSY AIDLVP--EE T--PDWTTVL  
*E. caballus* HNRMYNMVVPF FPPVTNEELF LTADQLGYSY AIDLVP--EQ T--PGWTTTL  
*M. musculus* HNRMYNMVVPF FPPVTNEELF LTAEQLGYSY AVDLSE--EE A--PVWSTTL  
*H. glaber* HNRMYNMVVPF FPPVTNEELF LTADQLGYSY AIDLPVSVEE T--PSWITTL  
*H. sapiens* HNRMYNMVVPF FPPVTNEELF LTSDQLGYSY AIDLPVSVEE T--PGWPTTL  
*M. domestica* HNRMYNMVVPF FPPVTNEEFF LTADQLGYDY SINLSASSSG KATQDQTLIL

**Topological domain: Lumenal, melanosome**

551 600

*M. rufoniger* PVVMGMLVAL VGLFVLLAFL QYRRLHKGYA PLMETQFN-K RYTEEA----  
*M. davidii* PVVLGMLVAL VGLFVLLAFL QYRRLRKGYA PLMETHLN-K RYTEEA----  
*M. brandtii* PVVMGMLVAL VGLFVLLAFL QYRRLRKGYA PLMETHWN-K RYTEEA----  
*M. lucifugus* PVVMGMLVAL VGLFVLLAFL QYRRLRKGYA PLMETHLN-K RYTEEA----  
*E. fuscus* PVVMGMLVVL VGLFVLLAFL QYRRLRKGYA PLMETHLNNK RYTEEA----

P. alecto SVVVGILVAL IGLLVLLAFL QYRRLRKGYA PLMETHLSNK RYMEEA----  
 P. vampyrus SLVMGILVAL IGLLVLLAFL QYQRLRKGYA PLMETHLSNK RYMEEA----  
 R. aegyptiacus SVVMGMLVAL IGLLVLLAFL QYRRLRKGYA PLMETHLSNK RYTEEA----  
 B. taurus SVVTGMLVVL VVLFALLLFL QYRRLRKGYT PLVETQLSNK RYTEEA----  
 E. caballus SVVMGMLVAL VGLFALLVFL QYRRLRKGYT PLMETHLSK- RYTEEA----  
 M. musculus SVVIGILGAF VLLGLLAFL QYRRLRKGYA PLMETGLSSK RYTEEA----  
 H. glaber SVVMGILVAL VGLFMLLIFL QYRRLRKGYT PLMETHLSNK RYTKEAERVQ  
 H. sapiens LVVMGTLVAL VGLFVLLAFL QYRRLRKGYT PLMETHLSSK RYTEEA----  
 M. domestica SVIGAGLVAL VALSLLLVL QYRRQRKGFA PLMETRFSNR KYTEDA----

Topological domain: Cytoplasmic

601

M. rufoniger -  
 M. davidii -  
 M. brandtii -  
 M. lucifugus -  
 E. fuscus -  
 P. alecto -  
 P. vampyrus -  
 R. aegyptiacus -  
 B. taurus -  
 E. caballus -  
 M. musculus -  
 H. glaber A  
 H. sapiens -  
 M. domestica -

(B)

*SLC45A2*

|                       | 1          |            |            |            | 50         |
|-----------------------|------------|------------|------------|------------|------------|
| <i>M. rufoniger</i>   | MKESEPFQP  | NSLPGSKS-- | ----KXAHKS | EGPRRRWRAC | RQVPHPAAMG |
| <i>M. davidii</i>     | -----      | -----      | -----      | -----      | -----MG    |
| <i>M. brandtii</i>    | MKESEPFQP  | NPLPGSKS-- | ----KPAHKS | EGPRRRWRAG | RQVPHPVAMG |
| <i>M. lucifugus</i>   | -----      | -----      | -----      | -----      | -----MG    |
| <i>E. fuscus</i>      | -----      | -----      | -----      | -----      | -----MG    |
| <i>P. alecto</i>      | -----      | -----      | -----      | -----      | -----      |
| <i>P. vampyrus</i>    | -----      | -----      | -----      | -----      | -----MG    |
| <i>R. aegyptiacus</i> | -----      | -----      | -----      | -----      | -----MG    |
| <i>B. taurus</i>      | MKEFEPRQP  | GRLCGPCSQA | PCQIHLGART | PGPRRRWWAC | RQVPRPVAMG |
| <i>E. caballus</i>    | MKEFEPLQP  | DHLCWLLSQA | LCQIQLEAQT | RGPPGWRWAC | RQVPHPVAMG |
| <i>M. musculus</i>    | -----      | -----      | -----      | -----      | -----MS    |
| <i>H. glaber</i>      | -----      | -----      | -----      | -----      | -----MG    |
| <i>H. sapiens</i>     | -----      | -----      | -----      | -----      | -----MG    |
| <i>M. domestica</i>   | -----      | -----      | -----      | -----      | -----MG    |
|                       | 51         |            |            |            | 100        |
| <i>M. rufoniger</i>   | GNSGQPGTHX | YTSLAEDGPL | AAGEQPRRPT | GRLIMHSMAM | FGREFCYAVE |
| <i>M. davidii</i>     | GNSGQPGTHT | YRSLAEDGPL | AAGEPPRRPT | GRLIMHSMAM | FGREFCYAVE |
| <i>M. brandtii</i>    | GNSGQPGTHT | YTSLTEDGPL | AAGEQPRRPT | GRLIMHSMAM | FGREFCYAVE |
| <i>M. lucifugus</i>   | GNSGQPGTHT | YTSLEEDGPL | AAGEQPRRPT | GRLIMHSMAM | FGREFCYAVE |
| <i>E. fuscus</i>      | GNTGQPGMHS | YTSLAEDGPW | AAGEQPKRPT | GRLIMHSMAM | FGREFCYAVE |
| <i>P. alecto</i>      | -----      | -----      | -----      | -----MAM   | FGREFCYAVE |
| <i>P. vampyrus</i>    | GNSGQLSIHT | YTSLGEDGPF | GFVEPPKRLT | GRLIMHSMAM | FGREFCYAVE |
| <i>R. aegyptiacus</i> | GNSGQPSIHT | YTSLAEDGPF | GFVEAPKRPT | GRLIMHSMAM | FGREFCYAVE |
| <i>B. taurus</i>      | DKSGQSPLRT | YKSLDEEGLF | GSAELPKRPT | GSLVMHSMAM | FGREFCYAVE |
| <i>E. caballus</i>    | GNSGQPGVPT | YKSLAEDGPF | GSVELPKRST | GRLVMHSMAM | FGREFCYAVE |



|              |            |            |            |            |            |
|--------------|------------|------------|------------|------------|------------|
| M. musculus  | GSNGPTDTHT | YQSLAEDCPF | GSVEQPKRST | GRLVMHSMAM | FGREFCYAVE |
| H. glaber    | SNGGQAGTHT | YQSLTEDALF | GSMEPPRRPT | GRLVMHSLAM | FGREFCYAVE |
| H. sapiens   | SNSGQAGRHI | YKSLADDGPF | DSVEPPKRPT | SRLIMHSMAM | FGREFCYAVE |
| M. domestica | VSGTQTGNPK | YTSLATAGSL | GHAEP RRST | GRLVMHSMAM | LGREFCYAVE |

101

150

|                |            |            |             |            |            |
|----------------|------------|------------|-------------|------------|------------|
| M. rufoniger   | AAYVTPVLLS | VGLPKSLYSV | VWLLSPILGF  | LLQPVVGSAS | DYCRAGWGRR |
| M. davidii     | AAYVTPVLLS | VGLPKSLYSV | VWLLSPILGF  | LLQPVVGSAS | DYCRAGWGRR |
| M. brandtii    | AAYVTPVLLS | VGLPKSLYSV | VWLLSPV LGF | LLQPVVGSAS | DYCRAGWGRR |
| M. lucifugus   | AAYVTPVLLS | VGLPKSLYSV | VWLLSPV LGF | LLQPVVGSAS | DYCRAGWGRR |
| E. fuscus      | AAYVTPVLLS | VGLPKSLYSV | VWLLSPV LGF | LLQPVVGSAS | DYCRAGWGRR |
| P. alecto      | AAYVTPVLLS | VGLPRSLYSM | VWLLSPV LGF | LLQLVVGSAS | DHCHATWGRR |
| P. vampyrus    | ASYVTPVLLS | VGLPKSLYSM | VWLLSPV LGF | LLQLVVGSAS | DHCHATWGRR |
| R. aegyptiacus | AAYVTPVLLS | VGLPRRLYSV | VWLLSPILGF  | LLQPVVGSAS | DHCHAMWGRR |
| B. taurus      | AAYVTPVLLS | VGLPKSLYSM | VWLLSPILGF  | LLQPVVGSAS | DHCRARWGRR |
| E. caballus    | AAYVTPVLLS | VGLPKRLYSV | VWLLSPV LGF | LLQPVVGSAS | DHCRARWGRR |
| M. musculus    | AAYVTPVLLS | VGLPKSLYSM | VWLLSPILGF  | LLQPVVGSAS | DHCRARWGRR |
| H. glaber      | AAYVTPVLLS | VGLPESLYSV | VWLLSPILGF  | LLQPVVGSAS | DHCQSRWGRR |
| H. sapiens     | AAYVTPVLLS | VGLPSSLYSI | VWFLSPILGF  | LLQPVVGSAS | DHCRSRWGRR |
| M. domestica   | AAYVTPVLLS | VGLPQSLYSV | VWLISPILGF  | MLQPIVGSAS | DHCRSRWGKR |

151

200

|                |            |            |             |            |                    |
|----------------|------------|------------|-------------|------------|--------------------|
| M. rufoniger   | RPYILALGVM | MLLGMALYLN | GDTVVSALT V | DPRRKL-VWA | ITITMMGVV <b>V</b> |
| M. davidii     | RPYILALGVM | MLLGMALYLN | GDTVVSALIA  | DPRRKL-IWA | ITITMMGVVL         |
| M. brandtii    | RPYILALGVM | MLLGMALYLN | GDTVVSALIA  | DPRRKL-IWA | ITITMMGVVL         |
| M. lucifugus   | RPYILALGIM | MLLGMALYLN | GDTVVSALIA  | DPRRKL-IWA | ITITMMGVVL         |
| E. fuscus      | RPYILALGVM | MLLGMALYLN | GDTVVSALIA  | DPRRKL-IWA | ITITMMGVVL         |
| P. alecto      | RPYILTAVM  | MLLGMGFYLN | GDAIVSALIA  | DPRRRL-IWT | ITITMLGVVL         |
| P. vampyrus    | RPYILTAVM  | MLLGMGFYLN | GDAIVSALIA  | DPRRRL-IWT | ITITMIGVVL         |
| R. aegyptiacus | RPYILTAVM  | MLLGMALYLN | GDTVVSALIA  | DPRRRL-IWA | ITITMIGVVL         |
| B. taurus      | RPYILTGLM  | MLLGMAMYLN | GDAIISALIA  | DPRRKP-IWA | ISITMIGVVL         |

|              |            |            |            |            |            |
|--------------|------------|------------|------------|------------|------------|
| E. caballus  | RPYILALSVI | MLLGMALYLN | GDAVISALIA | DRRKKL-TWA | ITITMIGVVL |
| M. musculus  | RPYILTAIM  | MLLGMALYLN | GDAVVSALVA | NPRQKL-IWA | ISITMVGVVL |
| H. glaber    | RPYILTLGIM | MLLGMALYLN | GDAVVSALIL | NPRRKL-VWA | ISVTMIGVVL |
| H. sapiens   | RPYILTLGVM | MLVGMALYLN | GATVVAALIA | NPRRKL-VWA | ISVTMIGVVL |
| M. domestica | RPYILTLGIL | MLLGMALYLN | GDAVVSAVFT | KPSKCLTMWA | VSITMIGVVL |

Transmembrane: Helical

201

250

|                |            |            |            |            |            |
|----------------|------------|------------|------------|------------|------------|
| M. rufoniger   | FDFAADFIDG | PIKAYLFDVC | SHQDKERGLH | YHALFTGFGG | ALGYLLGAID |
| M. davidii     | FDFAADFIDG | PIKAYLFDVC | SHQDKERGLH | YHALFTGFGG | ALGYLLGAID |
| M. brandtii    | FDFAADFIDG | PIKAYLFDVC | SHRDKERGLH | YHALFTGFGG | ALGYLLGAID |
| M. lucifugus   | FDFAADFIDG | PIKAYLFDVC | SHQDKERGLH | YHALFTGFGG | ALGYLLGAID |
| E. fuscus      | FDFAADFIDG | PIKAYLFDVC | SHQDKERGLH | YHALFTGFGG | ALGYLLGAID |
| P. alecto      | FDFAADFIDG | PIKAYLFDVC | SHQDKERGLF | YHALFTGFGG | ALGYLLGAID |
| P. vampyrus    | FDFAADFIDG | PIKAYLFDVC | SHQDKERGLY | YHALFTGFGG | ALGYLLGAID |
| R. aegyptiacus | FDFAADFIDG | PIKAYLFDVC | SHQDKERGLH | YHALFTGFGG | ALGYLLGAID |
| B. taurus      | FDFAADFIDG | PIKAYLFDVC | THRDKERGLH | FHALFTGLGG | ALGYLLGAID |
| E. caballus    | FDFAADFIDG | PIKAYLFDVC | SHQDKERGLH | HHALFTGLGG | ALGYLLGAID |
| M. musculus    | FDFAADFIDG | PIKAYLFDVC | SHQDKERGLH | YHALFTGFGG | ALGYLLGAID |
| H. glaber      | FDFAADFIDG | PIKAYLFDVC | SHRDKERGLH | YHALFTGFGG | ALGYLLGAID |
| H. sapiens     | FDFAADFIDG | PIKAYLFDVC | SHQDKERGLH | YHALFTGFGG | ALGYLLGAID |
| M. domestica   | FDFAADFIDG | PIKAYLFDVC | SYQDKERGLH | YHALFTGFGG | ALGYLLGAID |

Transmembrane: Helical

251

300

|                |            |            |             |           |            |
|----------------|------------|------------|-------------|-----------|------------|
| M. rufoniger   | WAHLELGRVL | GTEFQVMFFF | SALVLTLCFI  | IHLCSPEAP | LRDTAKDSSL |
| M. davidii     | WAHLKLGRVL | GTEFQVMFFF | SALVLTLCFI  | IHLCSPEAP | LRDTAKDSSL |
| M. brandtii    | WAHLKLGRVL | GTEFQVMFFF | SALVLTLCFI  | IHLCSPEAP | LRDTAKDSSL |
| M. lucifugus   | WAHLKLGRVL | GTEFQVMFFF | SALVLTLCFI  | IHLCSPEAP | LRDTAKDSSL |
| E. fuscus      | WAHLKLGRVL | GTEFQVMFFF | SALVLTLCFI  | IHLCSPEAP | LRDAARDVLP |
| P. alecto      | WAHLKLGRVL | GTEFQVMFFF | SASVLIILCFI | IHLCSPEAP | LRDVTKDIPP |
| P. vampyrus    | WAHLKLGRVL | GTEFQVMFFF | SALVLIILCFI | IHLCSPEAP | LRDVTKDIPP |
| R. aegyptiacus | WAHLKLGRVL | GTEFQVMFFF | SALVLTLCFI  | IHLCSPEAP | LRDVTKDIPP |

|                     |            |            |             |            |            |
|---------------------|------------|------------|-------------|------------|------------|
| <i>B. taurus</i>    | WAHLELGRLL | GTEFQVMFFF | SSLVLTLCFI  | IHLCSIPEAP | LRDVAKDIPP |
| <i>E. caballus</i>  | WAHLKLGRLM | GTEFQVMFFF | SALMLTLCVV  | IHLCSIPEAP | LRDVAKDIPP |
| <i>M. musculus</i>  | WVHLDLGRLL | GTEFQVMFFF | SALVLI LCFI | THLCSIPEAP | LRDAATDPPS |
| <i>H. glaber</i>    | WAHLELGRVL | GTEFQVMFFF | SALMLTLCFI  | IHLCSIPEAP | LRDVAKDISP |
| <i>H. sapiens</i>   | WAHLELGRLL | GTEFQVMFFF | SALVLTLCFT  | VHLCSISEAP | LTEVAKGIPP |
| <i>M. domestica</i> | WGHELEGRLL | GTEFQVMFFF | SVLVFTICLI  | IHLCSIPEAP | LCDNPEDSTL |

301

350

|                       |            |           |            |            |             |
|-----------------------|------------|-----------|------------|------------|-------------|
| <i>M. rufoniger</i>   | QQAPQDPPLP | SDKTYEYGS | EKVKNQYVHS | ELT-----VQ | GEKNKNPAEQ  |
| <i>M. davidii</i>     | QQAPQDPPLS | SDKTYEYGS | EKVKNQYVHS | ELT-----VQ | GEKTKNPAKQ  |
| <i>M. brandtii</i>    | QQAPQDPPLS | SDKTYEYGS | EKVKNQYVHS | ELT-----VQ | GEKTKNPAEQ  |
| <i>M. lucifugus</i>   | QQAPQDPPLS | SDKAYEYGS | EKVKNQYVHS | ELT-----VQ | GEKTKNPAEQ  |
| <i>E. fuscus</i>      | QQAPQDAPLS | ADKTYEYGS | EKVKNQDVHS | ELT-----MQ | GEKDTNPAEQ  |
| <i>P. alecto</i>      | QQAPQNPLS  | SDRMIEYGS | EKVKNQSVNP | ELV-----ML | GEKTKNPAEQ  |
| <i>P. vampyrus</i>    | QQAPQNPLS  | SDRMIEYGS | EKVKNQSVNP | ELV-----ML | GEKNKNPAEQ  |
| <i>R. aegyptiacus</i> | QQAPQNPLS  | SDRMIEYGS | EKVKNQSVNP | ELL-----IL | GEKSQNLAEQ  |
| <i>B. taurus</i>      | QQAPQDLALS | SDKMIEYGS | EKVKNQYVNP | ELV-----LQ | GGKTKNPAEQ  |
| <i>E. caballus</i>    | QQDSQDPLS  | SDRMIEYGS | EKVKNQYVNP | EMV-----LQ | GEKTTNT-QQ  |
| <i>M. musculus</i>    | QQDPQGSLS  | ASGMIEYGS | EKVKNQGADT | EQP-----VQ | EWKNKKPSGQ  |
| <i>H. glaber</i>      | QQAPQDPSLS | SDRMCKYGS | EKAKNQYVNP | ELA-----MQ | GRKNKSPA EQ |
| <i>H. sapiens</i>     | QQTPQDPLS  | SDGMIEYGS | EKVKNQYVNP | ELA-----MQ | GAKKNHAEQ   |
| <i>M. domestica</i>   | QHNPHSPLM  | QNGGSDYGS | ERVKNQFMKT | KQTELATAKR | GEVMENTKNO  |

351

400

|                     |           |           |            |            |            |
|---------------------|-----------|-----------|------------|------------|------------|
| <i>M. rufoniger</i> | VQRTMTMKS | LRLVNMPSH | YRCLCISHLI | GWTAFLSNML | FFTDFMGRIV |
| <i>M. davidii</i>   | IQRTMTMKS | LRLVNMPSH | YRCLCISHLI | GWTAFLSNML | FFTDFMGRIV |
| <i>M. brandtii</i>  | IQRTMTMKS | LRLVNMPSH | YRCLCISHLI | GWTAFLSNML | FFTDFMGRIV |
| <i>M. lucifugus</i> | IQRTMTMKS | LRLVNMPSH | YRCLCISHLI | GWTAFLSNML | FFTDFMGRIV |
| <i>E. fuscus</i>    | IQRTMTMKS | LRLVNMPSH | YRCLCISHLI | GWTAFLSNML | FFTDFMGRIV |
| <i>P. alecto</i>    | TQRAMTMKS | LRLVSMPSH | HRCLCISHLI | GWTAFLCNML | FFTDFMGQIV |
| <i>P. vampyrus</i>  | TQRAMTMKS | LRLVSMPSH | YRYLCISHLI | GWTAFLCSML | FFTDFMGQIV |

|                       |            |            |            |            |            |
|-----------------------|------------|------------|------------|------------|------------|
| <i>R. aegyptiacus</i> | TRRTVTLKSL | LRALVSMPSH | YRCLCISHLI | GWTAFLSNML | FFTDFMGQIV |
| <i>B. taurus</i>      | TQRTMTLRSL | LRALRSMPPH | YRCLCISHLI | GWTAFLSNML | FFTDFMGQIV |
| <i>E. caballus</i>    | TRRTMTMKSL | LRALVSMPPH | YRYLCISHLL | GWTAFLSNML | FFTDFMGQIV |
| <i>M. musculus</i>    | SQRTMSMKSL | LRALVNMPSH | YRCLCVSHLI | GWTAFLSNML | FFTDFMGQIV |
| <i>H. glaber</i>      | AQRVMTMKSL | LRALVNMPPH | YRCLCISHLI | GWTAFLSNML | FFTDFMGQIV |
| <i>H. sapiens</i>     | TRRAMTLKSL | LRALVNMPPH | YRYLCISHLI | GWTAFLSNML | FFTDFMGQIV |
| <i>M. domestica</i>   | TQNKMTMRSL | LKAILSMPPH | YRYLCVSHLI | GWTAFLSNML | FFTDFMGQIV |

401

450

|                       |            |            |            |            |            |
|-----------------------|------------|------------|------------|------------|------------|
| <i>M. rufoniger</i>   | YHGPNYSAHN | STEFLIYERG | VEVGCWGLCI | NAVFSSLYSY | FQKALVSYIG |
| <i>M. davidii</i>     | YHGPNYSAHN | STEFLIYERG | VEVGCWGLCI | NAVFSSLYSY | FQKALVSYIG |
| <i>M. brandtii</i>    | YHGPNYSAHN | STEFLIYERG | VEVGCWGLCI | NAVFSSLYSY | FQKALVSYIG |
| <i>M. lucifugus</i>   | YHGPNYSAHN | STEFLIYERG | VEVGCWGLCI | NAVFSSLYSY | FQKALVSYIG |
| <i>E. fuscus</i>      | YHGPNYSAHN | STEFLIYERG | VEVGCWGLCI | NAMFSSLYSY | FQKALVSYIG |
| <i>P. alecto</i>      | YHGDPYSAHN | STEFLIYERG | VEVGCWGLCL | NSLFSSLYSY | FQKALVSYTG |
| <i>P. vampyrus</i>    | YHGDPYSAHN | STEFLIYERG | VEVGCWGLCI | NSLFSSLYSH | FQKALVSYIG |
| <i>R. aegyptiacus</i> | YHGDPYSAHN | STEFLIYERG | VEVGCWGLCI | NSMFSSLYSY | FQKALVSYVG |
| <i>B. taurus</i>      | YHGDPYGAHN | STEFLIYQRG | VEVGCWGLCI | NSMFSSLYSY | FQKVLVPCIG |
| <i>E. caballus</i>    | YHGDPYSAHN | STEFLIYQRG | VEVGCWGLCI | NSVFSSLYSY | FQKVLVSYVG |
| <i>M. musculus</i>    | YHGDPYGAHN | STEFLIYERG | VEVGCWGLCI | NSVFSSVYSY | FQKAMVSYIG |
| <i>H. glaber</i>      | YRGDPYSAHN | STEFLIYERG | VEVGCWGLCI | NSVFSSLYSY | FQKALVPYIG |
| <i>H. sapiens</i>     | YRGDPYSAHN | STEFLIYERG | VEVGCWGFCI | NSVFSSLYSY | FQKVLVSYIG |
| <i>M. domestica</i>   | YHGDPYAPHN | STSFLIYERG | VEVGCWGLCI | NSVFSSLYSY | FQKVLLSYVG |

451

500

|                     |            |            |            |            |            |
|---------------------|------------|------------|------------|------------|------------|
| <i>M. rufoniger</i> | LKGLYFMGYL | LFGLGTGFIG | LFPNVYSTLA | LCASFGVMSS | TLYTVPFNL  |
| <i>M. davidii</i>   | LKGLYFMGYL | LFGLGTGFIG | LFPNVYSTLA | LCASFGVMSS | TLYTVPFNL  |
| <i>M. brandtii</i>  | LKGLYFMGYL | LFGLGTGFIG | LFPNVYSTLA | LCASFGVMSS | TLYTVPFNL  |
| <i>M. lucifugus</i> | LKGLYFMGYL | LFGLGTGFIG | LFPNVYSTLA | LCASFGVMSS | TLYTVPFNL  |
| <i>E. fuscus</i>    | LKGLYFMGYL | LFGLGTGLIG | LFPNVYSTLA | LCASFGVMSS | TLYTVPFNL  |
| <i>P. alecto</i>    | LKGLYFMGYL | LFGLGTGLMG | LFRNVYSTLA | LCASFGVMSS | TLSTIPFNLI |

|                       |            |            |            |            |            |
|-----------------------|------------|------------|------------|------------|------------|
| <i>P. vampyrus</i>    | LKGLYFMGYL | LFGLGTALMG | FFRNVYSTLA | LCTLFGVMSS | TLCTIPFNLI |
| <i>R. aegyptiacus</i> | LKGLYFMGYL | LFGLGTGFIS | LFPNVYSALA | LCASFGVMSS | TLYTVPFNLI |
| <i>B. taurus</i>      | LKGLYFMGYL | LFGLGTGFIG | LFPNVYSTLA | MCTLFGVMSS | TLYTVPFTLI |
| <i>E. caballus</i>    | LKGLYFMGYL | LFGLGTGFIG | LFPNIYSTLV | LCTSFGVMSS | TLYTVPFNLI |
| <i>M. musculus</i>    | LKGLYFMGYL | LFGLGTGFIG | LFPNVYSTLV | LCSMFGVMSS | TLYTVPFNLI |
| <i>H. glaber</i>      | LKGLYFMGYL | LFGLGTGFIG | LFPNVYSTLV | LCTLFGIMSS | TLYTVPFNLM |
| <i>H. sapiens</i>     | LKGLYFTGYL | LFGLGTGFIG | LFPNVYSTLV | LCSLFGVMSS | TLYTVPFNLI |
| <i>M. domestica</i>   | LKGLYIMGYL | LFGLGTGFIG | LFPNVYSTLV | LCALFGVMSS | TLYTVPFNLM |

501

550

|                       |            |            |            |            |            |
|-----------------------|------------|------------|------------|------------|------------|
| <i>M. rufoniger</i>   | AEYHRKEQEE | QKQKARAG-- | APDSGSRGQG | LDCATLTCMV | QLAQILVGGG |
| <i>M. davidii</i>     | AEYHREEQEE | QKQKARAG-- | APDSGGRGQG | LDCATLTCMV | QLAQILVGGG |
| <i>M. brandtii</i>    | AEYHREEQEE | QKQKARAG-- | APDSGGRGQG | LDCATLTCMV | QLAQILVGGG |
| <i>M. lucifugus</i>   | AEYHREEQEE | QKQKARAG-- | APDSGGRGQG | LDCATLTCMV | QLAQILVGGG |
| <i>E. fuscus</i>      | AEYHREEQEE | Q-QKARAG-- | APDSGGRGQG | LDCATLTCMV | QLAQILVGGG |
| <i>P. alecto</i>      | AEYHREEQEQ | QKQQAQEG-- | GPACSGRGEG | LDCATLTCMV | QLAQILVGGG |
| <i>P. vampyrus</i>    | AEYHREEQEQ | QKQQAQEG-- | GPACSGRGEG | LDCATLTCMV | QLAQILVGGG |
| <i>R. aegyptiacus</i> | AEYHREEQEE | QKQQAQEA-- | DPASRGRGQG | LDCATLTCMV | QLAQILVGGG |
| <i>B. taurus</i>      | AVYHHEE--- | QKQRALGG-- | GPDGSSRGQG | LDCAALTCMV | QLAQILVGGG |
| <i>E. caballus</i>    | AEYHREEQEK | QRRQAQGG-- | DVDSSGRGQG | LDCAALTCMV | QLAQILVGGG |
| <i>M. musculus</i>    | AEYHREEEKE | KGQ-EAPG-- | GPDNQGRGKG | VDCAALTCMV | QLAQILVGGG |
| <i>H. glaber</i>      | AEYHLAEEKE | KRRQAPGWSS | DSSGTERGKG | VDCATLTCMV | QLAQILVGS  |
| <i>H. sapiens</i>     | TEYHREEEKE | RQ-QAPGG-- | DPDNSVRGKG | MDCATLTCMV | QLAQILVGGG |
| <i>M. domestica</i>   | AEYHHEDERQ | QATG-----  | MAPSGCRGRG | IDCAALTCMV | QLAQILVGVG |

551

587

|                     |            |           |            |         |
|---------------------|------------|-----------|------------|---------|
| <i>M. rufoniger</i> | LGFLVNMVGS | VVVVISASL | VALMGCCFVA | LFVRYVQ |
| <i>M. davidii</i>   | LGFLVNMAGS | VVVVISASL | VALMGCCFVA | LFVRYVQ |
| <i>M. brandtii</i>  | LGFLVNMAGS | VVVVISASL | VALMGCCFVA | LFVRYVQ |
| <i>M. lucifugus</i> | LGFLVNMAGS | VVVVISASL | VALMGCCFVA | LFVRYVQ |
| <i>E. fuscus</i>    | LGLLVNMAGS | VVVVISASL | VALMGCCFVA | LFVRYVQ |

|                |            |            |            |         |
|----------------|------------|------------|------------|---------|
| P. alecto      | LGFLVNMAGS | VVVVVITASA | VALIGCCFVA | LFVRCVD |
| P. vampyrus    | LGFLVNMAGS | VVVVVITASA | VALIGCCFVA | LFVRCVD |
| R. aegyptiacus | LGFLVNMAGS | VVVVVITASA | VALIGCCFVA | LFVRYVD |
| B. taurus      | LGLLVNTAGS | VVVVVITASA | VALIGCCFVA | LFVRYVD |
| E. caballus    | LGFLVNIAGS | VVVVVITASV | VALIGCCFVW | LFVRYVA |
| M. musculus    | LGFLVNMAGS | VVVVVITASA | VSLIGCCFVA | LFVRYVD |
| H. glaber      | LGFLVNTAGS | VIVVVITAST | VALIGCCFVA | VFVRYVG |
| H. sapiens     | LGFLVNTAGT | VVVVVITASA | VALIGCCFVA | LFVRYVD |
| M. domestica   | LGVLVTSAES | VVVVVIVASA | VALFGCCFVA | LFVRCVE |

Topological domain: Extracellular

(C)

*TYRP1*

|                | 1          |            |            | 50                     |
|----------------|------------|------------|------------|------------------------|
| M. rufoniger   | -----      | -----      | -----      | -----M EVHKLLSLGY      |
| M. davidii     | -----      | -----      | -----      | -----M EVHKLLSLGY      |
| M. brandtii    | -----      | -----      | -----      | -----M EVHRLLSLGY      |
| M. lucifugus   | MTAFDKWHQD | NLIFLYVP-- | ---QSLHKGP | QNQSLASSRM EVHRLLSLGY  |
| E. fuscus      | -----      | -----      | -----      | -----M EVHKLLPLGY      |
| P. alecto      | -----      | -----      | -----      | -----M KDHKFLSLGC      |
| P. vampyrus    | -----      | -----      | -----      | -----M KDNKFLSLGC      |
| R. aegyptiacus | -----      | -----      | -----      | -----M KDHKLLCLGC      |
| B. taurus      | MKSIL----- | -KLDFYLRAS | VSTQRAANQK | LSCILASSRM KSPTLLSLGY  |
| E. caballus    | -----      | -----      | -----      | ---MFASSRM KAHKLLSLGY  |
| M. musculus    | -----      | -----      | -----      | -----M KSYNVLPLAY      |
| H. glaber      | -----      | -----      | -----      | -----M STPGRPALRP      |
| H. sapiens     | -----      | -----      | -----      | -----M SAPKLLSLGC      |
| M. domestica   | -----      | -----      | -----      | -----MARRGHLEW         |
|                | 51         |            |            | 100                    |
| M. rufoniger   | -IFLPLLFTQ | QAGAQFPREC | ATTEALRNGV | CCPD LAPVSG PGTDPCGSSS |
| M. davidii     | -VFLPLLFTQ | QAGAQFPREC | ATTEALRNGV | CCPD LAPVSG PGTDPCGSSS |
| M. brandtii    | -IFLPLLFTQ | QAGAQFPREC | ATTEALRNGV | CCPD LAPVSG PGTDPCGSSS |
| M. lucifugus   | -VFLPLLFTQ | QAGAQFPREC | ATTEALRNGV | CCPD LAPVSG PGTDPCGSSS |
| E. fuscus      | -IFLPLLFTQ | QAGAQFPREC | ATTEALRNGV | CCPD LSPVSG PGTDPCGSSS |
| P. alecto      | -IFLSLLFFQ | QTWAQFPREC | ATIEALRNGV | CCPD LSALSG PGTDLCGSSS |
| P. vampyrus    | -IFLSLLFFQ | QTWAQFPREC | ATIEALRNGV | CCPD LSALSG PGTDLCGSSS |
| R. aegyptiacus | -IFLPLFFFQ | QTWAQFPREC | ATIEALRNGV | CCPD LSALSG PGTDLCGSSS |
| B. taurus      | -MFLVLLFFQ | QAWAQFPREC | ATIEALRNGV | CCPD LSPLSG PGSDRCGLSS |
| E. caballus    | -LFLPPLFFQ | QAWAQFPREC | ATVEALKNGV | CCPD LNPLSG PGTDRCGSSS |

|              |                                                        |
|--------------|--------------------------------------------------------|
| M. musculus  | IS-LFLMLFY QVWAQFPREC ANIEALRRGV CCPDLLPSSG PGTDPCGSSS |
| H. glaber    | VLLTLLLLWH LARAQFPAC ASAPALRNGE CCPDLRPAAG PGSDRCGAAS  |
| H. sapiens   | -IFFPLLLFQ QARAQFPQC ATVEALRSGM CCPDLSPVSG PGTDRCGSSS  |
| M. domestica | -MLWPLLLLH QSDAQFPREC ATLDALRSGE CCPDLSLGPE PGTDSCGSST |

Topological domain: Lumenal, melanosome

101

150

|                |                                                        |
|----------------|--------------------------------------------------------|
| M. rufoniger   | GRGRCEAVTA DSRPHGPQYP HDGRDDREGW PTRFFNRTCH CNGNFWGHNC |
| M. davidii     | GRGRCEAVTA DSRPHGPQYP HDGQDDREGW PTRFFNRTCH CNGNFSGHNC |
| M. brandtii    | GRGRCEAVTA DSRPHGPQYP HDGLDDREGW PTRFFNRTCH CNGNFSGHNC |
| M. lucifugus   | GRGRCEAVTA DSRPHGPQYP HDGRDDREGW PTRFFNRTCH CNGNFSGHNC |
| E. fuscus      | GRGRCEAVSA DFRPHSPQYP HDGRDDREGW PTRFFNRTCH CNGNFSGHNC |
| P. alecto      | GRGRCEAVTA DFRPHSPLYP HDGRDDRERW PTRFFNRTCH CNGNFSGHNC |
| P. vampyrus    | GRGRCEAVTA DFRPHSPLYP HDGRDDRESW PTRFFTRACH CNGNFSGHNC |
| R. aegyptiacus | GRGRCEAVTA DFRPHSPLYP HDGRDDREGW PTRFFNRTCH CNGNFSGHNC |
| B. taurus      | GRGRCEVIA DSRPHSHHYP HDGRDDREGW PTRFFNRTCH CNGNFSGHNC  |
| E. caballus    | GRGRCEAVTA DSRPHSHHYP HDGRDDREAW PTRFFNRTCH CNGNFSGHNC |
| M. musculus    | GRGRCAVIA DSRPHSRHYP HDGKDDREAW PLRFFNRTCQ CNDNFSGHNC  |
| H. glaber      | GRGRCEAVMA DSRPHSAGYP HDGRDDREAW PLRFFNRTCQ CAGNFAGHNC |
| H. sapiens     | GRGRCEAVTA DSRPHSPQYP HDGRDDREW PLRFFNRTCH CNGNFSGHNC  |
| M. domestica   | GRGRCAVTA DSRPHGPQYP HDGRDDREAW PTRFFNRTCH CNGNFSGYNC  |

Topological domain: Lumenal, melanosome

151

200

|                |                                                                 |
|----------------|-----------------------------------------------------------------|
| M. rufoniger   | GTCRPGWRGI ACDQRVLTVR RNLLD <b>F</b> SIEE KNYFVQALDM AKRTTHPQWV |
| M. davidii     | GTCRPGWRGT ACDQRVLTVR RNLLDLSTEE KNYFVRALDM AKRTTHPQFV          |
| M. brandtii    | GTCRPGWRGT ACDQRVLTVR RNLLDLSTEE KNYFVRALDM AKRTTHPQFV          |
| M. lucifugus   | GTCRPGWRGN ACDQRVLTVR RNLLDLSTEE KNYFVRALDM AKRTTHPQFV          |
| E. fuscus      | GTCRPGWRGT ACDQRVLTVR RNLLDLSTEE KNYFVRALDM AKRTTHPRFV          |
| P. alecto      | GTCRPGWRGA ACDERILTVR RNLLDLSTEE KKYFVQALDM AKRTTHPQFV          |
| P. vampyrus    | GTCRPGWRGA ACDERILTVR RNLLDLSTEE KKYFVQALDM AKRTTHPQFV          |
| R. aegyptiacus | GTCRPGWRGA ACDERILTVR RNLLDLSTEE KNYFVQALDM AKRTTHPQFV          |
| B. taurus      | GTCRPGWGA ACDQRVLTVR RNLLDLSTEE KNRFVRALDM AKRTTHPQFV           |



|                     |                                                        |
|---------------------|--------------------------------------------------------|
| <i>E. caballus</i>  | GTCRPGWRGA ACDQRVLTVR RNLLDLSTEE KSYFVRALDM AKRTTHPQFV |
| <i>M. musculus</i>  | GTCRPGWRGA ACNQKILTVR RNLLDLSPEE KSHFVRALDM AKRTTHPQFV |
| <i>H. glaber</i>    | GACRPGWAGP GCSQRALAVR RNLLDLSAEE KNHFVQALDM AKRTTHPQFV |
| <i>H. sapiens</i>   | GTCRPGWRGA ACDQRVLIVR RNLLDLSKEE KNHFVRALDM AKRTTHPLFV |
| <i>M. domestica</i> | GTCKPGWRGS TCDQRVITVR RNLLDLSTEE RNRFIQALDM AKRTIHPHLV |

**Topological domain: Lumenal, melanosome**

201

250

|                       |                                                       |
|-----------------------|-------------------------------------------------------|
| <i>M. rufoniger</i>   | IATRRSEEIL GPDGNTQFE NISIYNYFVW THYYSVKKTF LGAGQESFGE |
| <i>M. davidii</i>     | IATRRSEEIL GPDGNTQFE NISIYNYFVW THYYSVKKTF LGAGQESFGE |
| <i>M. brandtii</i>    | IATRRSEEIL GPDGNTQFE NISIYNYFVW THYYSVKKTF LGAGQESFGE |
| <i>M. lucifugus</i>   | IATRRSEEIL GPDGNTQFE NISIYNYFVW THYYSVKKTF LGAGQESFGE |
| <i>E. fuscus</i>      | IATRRSEEIL GPDGNTQFE NISIYNYFVW THYYSVKKTF LGAGQESFGE |
| <i>P. alecto</i>      | IATRRSEEIL GPDGNTQFE NISIYNYFVW THYYSVKKTF LGAGQKSFGE |
| <i>P. vampyrus</i>    | IATRRSEEIL GPDGNTQFE NISIYNYFVW THYYSVKKTF LGAGQKSFGE |
| <i>R. aegyptiacus</i> | IATRRSEEIL GPDGNTQFE NISIYNYFVW THYYSVKKTF LGAGQESFGE |
| <i>B. taurus</i>      | IATRRSEEIL GPDGNTQFE NISIYNYFVW THYYSVKKTF LGAGQESFGE |
| <i>E. caballus</i>    | IATRRSEEIL GPDGNTQFE NVSIYNYFVW THYYSVKKTF LGAGQESFGE |
| <i>M. musculus</i>    | IATRLEDIL GPDGNTQFE NISVYNYFVW THYYSVKKTF LGTGQESFGD  |
| <i>H. glaber</i>      | IATRRSKEIL GEDGNTQFE NISIYNYFVW THYYSVKKTF LGPGQESFGE |
| <i>H. sapiens</i>     | IATRRSEEIL GPDGNTQFE NISIYNYFVW THYYSVKKTF LGVGQESFGE |
| <i>M. domestica</i>   | IATRRSEELL GTDGNTQFE NISIYNYFVW AHYYSVKKTF LGEGQESFGA |

**Topological domain: Lumenal, melanosome**

251

300

|                       |                                                        |
|-----------------------|--------------------------------------------------------|
| <i>M. rufoniger</i>   | VDFSHEGPAF LTWHRYHLLQ LERDMQEMLQ NPSFSLPYWN FATGKNVCDI |
| <i>M. davidii</i>     | VDFSHEGPAF LTWHRYHLLQ LERDMQEMLQ NPSFALPYWN FATGKNVCDI |
| <i>M. brandtii</i>    | VDFSHEGPAF LTWHRYHLLQ LERDMQEMLQ NPSFSLPYWN FATGKNVCDI |
| <i>M. lucifugus</i>   | VDFSHEGPAF LTWHRYHLLQ LERDMQEMLR NPSFSLPYWN FATGKNVCDI |
| <i>E. fuscus</i>      | VDFSHEGPAF LTWHRFHLLQ LERDMQEMLQ NPSFSLPYWN FATGKNVCDI |
| <i>P. alecto</i>      | VDFSHEGPAF LTWHRYHLLQ LERDMQEMLR NPSFSLPYWN FATGKNTCDI |
| <i>P. vampyrus</i>    | VDFSHEGPAF LTWHRYHLLQ LERDMQEMLR NPSFSLPYWN FATGKNTCDI |
| <i>R. aegyptiacus</i> | VDFSHEGPAF LTWHRYHLLQ LERDMQEMLR NPSFSLPYWN FATGKNTCDI |

|              |            |            |            |            |            |
|--------------|------------|------------|------------|------------|------------|
| B. taurus    | VDFSHEGPAF | LTWHRYHLLQ | LERDMQEMLQ | DPSFSLPYWN | FATGKNTCDI |
| E. caballus  | VDFSHEGPAF | LTWHRYHLLQ | LERDMQEMLQ | DPSFSLPYWN | FATGRNICDI |
| M. musculus  | VDFSHEGPAF | LTWHRYHLLQ | LERDMQEMLQ | EPSFSLPYWN | FATGKNVCDV |
| H. glaber    | VDFSHEGPAF | LTWHRYHLLQ | LEKDMQDMLQ | EPSFSLPYWD | FATGKNVCDV |
| H. sapiens   | VDFSHEGPAF | LTWHRYHLLR | LEKDMQEMLQ | EPSFSLPYWN | FATGKNVCDI |
| M. domestica | VDFSHEGPAF | LTWHRYHLLQ | LEKDMQEMLQ | DPTFALPYWN | FATGGNTCDI |

**Topological domain: Lumenal, melanosome**

301

350

|                |            |             |            |             |            |
|----------------|------------|-------------|------------|-------------|------------|
| M. rufoniger   | CTDDMMGSRS | NFDPNLISPN  | SVFSQWRVVC | ESLEDYDTLG  | TLCNSTEGAP |
| M. davidii     | CTDDMMGSRS | NFDPNFIISPN | SVFSQWRVVC | ESLEDYDTLG  | TLCNSTEGAP |
| M. brandtii    | CTDDMMGSRS | NFDPNLISAN  | SVFSQWRVVC | ESLEDYDTLG  | TLCNSTEGAP |
| M. lucifugus   | CTDDMMGSRS | SFDPNLISAN  | SVFSQWRVVC | ESLEDYDTLG  | TLCNSTEGAP |
| E. fuscus      | CTDDMMGSRS | NFDPNLISPN  | SVFSQWRVVC | ESLEDYDTLG  | TLCNSTEGAP |
| P. alecto      | CTDDLMSRS  | NFDSNLISPN  | SVFSQWRVVC | ESLEDYDTLG  | TLCNSTEGGP |
| P. vampyrus    | CTDDLMSRS  | NFDSNLISPN  | SVFSQWRVVC | ESLEDYDILG  | TLCNSTEGGP |
| R. aegyptiacus | CTDDLMSRS  | NFDSNLISPN  | SVFSQWRVVC | ESLEDYDTLG  | TLCNSTEGGP |
| B. taurus      | CTDDLMSRS  | NFDSTLISPN  | SVFSQWRVVC | ESLEDYDTLG  | TLCNSTEGGP |
| E. caballus    | CTDDLMSRS  | NFDSSLISPN  | SVFSQWRVVC | ESLEDYDTLG  | TLCNSTEGGP |
| M. musculus    | CTDDLMSRS  | NFDSTLISPN  | SVFSQWRVVC | ESLEEDYDTLG | TLCNSTEGGP |
| H. glaber      | CTDDLMSRS  | SFDSTLISPN  | SVFSQWHMVC | ESLEDYDTLG  | TLCNSTEGGP |
| H. sapiens     | CTDDLMSRS  | NFDSTLISPN  | SVFSQWRVVC | DSLEDYDTLG  | TLCNSTEDGP |
| M. domestica   | CTDNLMSRS  | NFDFSLISPN  | SVFSQWRVLC | ESVEDYDTLG  | TICNSTEGGP |

**Topological domain: Lumenal, melanosome**

351

400

|              |            |            |            |            |            |
|--------------|------------|------------|------------|------------|------------|
| M. rufoniger | IRRNPAGNVA | RPMVQRLPEP | QDVAQCLEVG | LFDTPPFYSN | STNSFRNTVE |
| M. davidii   | IRRNPAGNVA | RPMVQRLPEP | QDVAQCLEVG | LFDTPPFYSN | STNSFRNTVE |
| M. brandtii  | IRRNPAGNVA | RPMVQRLPEP | QDVAQCLEVG | LFDTPPFYSN | STNSFRNTVE |
| M. lucifugus | IRRNPAGNVA | RPMVQRLPEP | QDVAQCLEVG | LFDTPPFYSN | STNSFRNTVE |
| E. fuscus    | IRRNPAGNVA | RPMVQRLPEA | QDVAQCLEVG | LFDTPPFYSN | SSNSFRNTVE |
| P. alecto    | IRRNPAGNVA | RPMVQRLPEP | QDVIQCLEVG | LFDTPPFYSN | STNSFRNTVE |
| P. vampyrus  | IRRNPAGNVA | RPMVQRLPEP | QDVTQCLEVG | LFDTPPFYSN | STNSFRNTVE |

R. aegyptiacus IRRNPAGNVA RPMVQRLPEP QDVARCLEVG LFDTPPFYNS STNSFRNTVE  
 B. taurus IKRNPAGNVA RPMVQRLPKP QDVAQCLEVG SFDTPPFYNS STNSFRNTVE  
 E. caballus IRRNPAGNVA RPMVQRLPEP QDVAQCLEVG LFDTPPFYNS STNSFRNTVE  
 M. musculus IRRNPAGNVG RPAVQRLPEP QDVTQCLEVR VFDTPPFYNS STDSFRNTVE  
 H. glaber IRRNPAGNVA RPMVQRLPAP QDVAQCLEVG VFDTPPFYNS STDSFRNTVE  
 H. sapiens IRRNPAGNVA RPMVQRLPEP QDVAQCLEVG LFDTPPFYNS STNSFRNTVE  
 M. domestica IRRNPAGNVA RPMVQRLPEP QDVAQCLEVG LFDTPPFYNS STNSFRNTVE

Topological domain: Lumenal, melanosome

401 450

M. rufoniger GYNDPMGRYD PAVRSLHNLA HLFLNGTGGQ THLSPNDPIF ILLHTFTDAI  
 M. davidii GYSDDPMGRYD PAVRSLHNLA HLFLNGTGGQ THLSPNDPIF VLLHTFTDAI  
 M. brandtii GYSDDPMGRYD PAVRSLHNLA HLFLNGTGGQ THLSPNDPIF VLLHTFTDAI  
 M. lucifugus GYSDDPMGRYD PAVRSLHNLA HLFLNGTGGQ THLSPNDPIF VLLHTFTDAI  
 E. fuscus GYSDDPMGRYD PAVRTLHNLA HLFLNGTGGQ THLSPNDPIF VLLHTFTDAI  
 P. alecto GYSDDPTGKYD PAVRSLHNLA HLFLNGTGGQ THLSPNDPIF ILLHTFTDAL  
 P. vampyrus GYSDDPTGKYD PAVRSLHNLA HLFLNGTGGQ THLSPNDPIF VLLHTFTDAL  
 R. aegyptiacus DIST-----  
 B. taurus GYSHTPMGRYD PAVRSLHNLA HLFLNGTGGQ THLSPNDPIF VLLHTFTDAV  
 E. caballus GYSDDPTGKYD PAVRSLHNLA HLFLNGTGGQ THLSPNDPIF VLLHTFTDAV  
 M. musculus GYSAPTGKYD PAVRSLHNLA HLFLNGTGGQ THLSPNDPIF VLLHTFTDAV  
 H. glaber GYSDDPTGKYD PAVRSLHNLA HLFLNGTGGQ THLSPNDPIF VLLHTFTDAI  
 H. sapiens GYSDDPTGKYD PAVRSLHNLA HLFLNGTGGQ THLSPNDPIF VLLHTFTDAV  
 M. domestica GYSDDPTGRYD PAVRSLHNLA HLFLNGTGGQ THLSPNDPIF VLLHTFTDAV

Topological domain: Lumenal, melanosome

451 500

M. rufoniger FDEWLRRYNA DISTFPLENA PIGHNRQYNM VPFWPPXTNT EMFVTAPDNL  
 M. davidii FDEWLRRYNA DISTFPLENA PIGHNRQYNM VPFWPPITNT EMFVTAPDNL  
 M. brandtii FDEWLRRYNA DISTYPLENA PIGHNRQYNM VPFWPPITNT EMFVTAPDNL  
 M. lucifugus FDEWLRRYNA DISTFPLENA PIGHNRQYNM VPFWPPVTNT EMFVTAPDNL  
 E. fuscus FDEWLRRYNA DISTFPLENA PIGHNRQYNM VPFWPPITNT EMFVTAPDNL  
 P. alecto FDEWLRRYNA DISVFPLENA PIGHNRQYNM VPFWPPITNT EMFVTAPDNL

*P. vampyrus* FDEWLRRYNA DISAFPLENA PIGHNRQYNM VPFWPPITNT EMFVTAPDNL  
*R. aegyptiacus* ----- ----FPLKMP LI-IDNNQIW YAFWPPITNI EMFVTAPDNL  
*B. taurus* FDEWLRRYNA DISTYPLENA PIGHNRQYNM VPFWPPVTNI EMFVTAPDNL  
*E. caballus* FDEWLRRYNA DISTFPLENA PIGHNRQYNM VPFWPPITNV EMFVTAPDNL  
*M. musculus* FDEWLRRYNA DISTFPLENA PIGHNRQYNM VPFWPPVTNT EMFVTAPDNL  
*H. glaber* FDEWLRRYNA DISTFPLENA PIGHNRQFNM VPFWPPVTNT EMFVTAADNL  
*H. sapiens* FDEWLRRYNA DISTFPLENA PIGHNRQYNM VPFWPPVTNT EMFVTAPDNL  
*M. domestica* FDEWLRRYNP DISIFPLENA PIGHNRQYNM VPFWPPVTNT EMFVTAPDNL

**Topological domain: Lumenal, melanosome**

501

550

*M. rufoniger* GYTYEQWPG -RSFHISEII TIAVVAALLL VA---VI--- -FVGASCLIR  
*M. davidii* GYTYEQWPG -RSFHISEII TIAVVAALLL VA---VI--- -FVGASCLIR  
*M. brandtii* GYTYEQWPG -RSFRISEII TIAVVAALLL VA---VI--- -FVGASCLIR  
*M. lucifugus* GYTYEQWPG -RSFRISEII TIAVVAALLL VA---VI--- -FVGASCLIR  
*E. fuscus* GYTYEQWPG -RSFHISEII TIAVVAALLL VA---VI--- -FVGASCLIR  
*P. alecto* GYTYEQWPS -RNFSISEIV TIAVIAALLL VA---VI--- -FGGASCLIR  
*P. vampyrus* GYTYEQWPS -RNFSISEIV TIAVIAALLL VA---VI--- -FGGASCLIR  
*R. aegyptiacus* GYTYEQWPS -RNFSISEIV TIAVVAALLL VA---VV--- -FVGASCLIR  
*B. taurus* GYTYEQWPS -RSFSISEIV TIAVVAALSL VA---VI--- -FAGASCLIR  
*E. caballus* GYTYEQWPG -RDFSISEIV TIAVVAALLV VA---VI--- -FVGASCLIH  
*M. musculus* GYAYEQWPE APRMKPTSLS SLITINAMLR TMRSSRILTT PWSDSLPIPI  
*H. glaber* GYTYEQWPT GQNFISEIV TIAVVAALLL VG---LI--- -FLGISCLIR  
*H. sapiens* GYTYEQWPS -REFSVPEII AIAVVGALLL VA---LI--- -FGTASYLIR  
*M. domestica* GYAYEQWPR -RAFNVTEII TMTVVAALIL VA---IV--- -FVVTCLIR

**Topological domain: Lumenal, melanosome**

551

596

*M. rufoniger* ARRNMDANQ PLLTDQYRHY ---AEEYEK- ----IP-NPX QSMV--  
*M. davidii* ARSNMDEANQ PLLTDQYRHY ---AEEYEK- ----IP-NPN QSMV--  
*M. brandtii* ARSNMDEANQ PLLTDQYRHY ---AEEYEK- ----VP-NPN QSMV--  
*M. lucifugus* ARSNMDEANQ PLLTDQYRHY ---AEEYEK- ----VP-NPN QSMV--  
*E. fuscus* ARSNMDEANQ PLLTDQYRHY ---AEEYEK- ----IP-NPN QSMV--

|                       |                                                    |
|-----------------------|----------------------------------------------------|
| <i>P. alecto</i>      | AKNKRDEANQ PLLTDQYRHY ---AEEYET- ----IQ-NHN QSMV-- |
| <i>P. vampyrus</i>    | AKNKRDEANQ PLLTDQYRHY ---AEEYET- ----IQ-NHN QSMV-- |
| <i>R. aegyptiacus</i> | AKSNMDEANQ PLLTDQYRDY ---AEEYEK- ----IQ-NPN QSMV-- |
| <i>B. taurus</i>      | ARSNMDEANQ PLLTDQYQHY ---IEEYEK- ----IH-NPN QSVV-- |
| <i>E. caballus</i>    | ARSNRDEATQ PLLTDQYQHY ---AAEYEK- ----LP-DPN QSMV-- |
| <i>M. musculus</i>    | ARSRLGS--- NLIETQLSTV FPLASFFSSQ DRCGLELKHC SPVMTV |
| <i>H. glaber</i>      | ARSKMDEASQ PLLIDQYQHY ---DEGYEK- ----VQ-NPN QPTV-- |
| <i>H. sapiens</i>     | ARRSMDEANQ PLLTDQYQCY ---AEEYEK- ----LQ-NPN QSVV-- |
| <i>M. domestica</i>   | ARRNKDESQ PLLSDQYQRY ---AEEYEK- ----LS-NPS QSMV--  |

(D)

*OCA2*

|                       | 1                                          | 50                              |
|-----------------------|--------------------------------------------|---------------------------------|
| <i>M. rufoniger</i>   | -----MH LEEEGGRVS- SGKLEVELHQ TSA---SP--   | -----                           |
| <i>M. davidii</i>     | -----MH LEKEGGRLS- SDKLEVELHQ TSA---SPRA   | GLGL-----                       |
| <i>M. brandtii</i>    | -----MH LEKEGGRLS- SGKLEVELHQ TSA---SP--   | -----                           |
| <i>M. lucifugus</i>   | -----MH LEKEGGRLS- SGKLEVELHQ TSA---SPRA   | GLGL-----                       |
| <i>E. fuscus</i>      | -----MH LEKAGGRPSS GKKLEVELHQ TSA---APRA   | GLGP-----                       |
| <i>P. alecto</i>      | -----MH LECRDGRLA- SGVLETTELHR SSA---PVSA  | RLGGPEGRAT                      |
| <i>P. vampyrus</i>    | -----MH LECRDGRLA- SGVLETTELHR SSA---PVSA  | RLGGTEGRAT                      |
| <i>R. aegyptiacus</i> | -----MH LERRDGRLS- SGVLETTELHR SSA---PASA  | GLGGPEGRAT                      |
| <i>B. taurus</i>      | -----MH LENKDGRLA- SGRLEMELHQ TSA---PTSA   | GLGGSGLVEL                      |
| <i>E. caballus</i>    | -----MH LESKDGGLT- SGTLEMELHQ TSA---PTCA   | GLGGPGLVRH                      |
| <i>M. musculus</i>    | -----MR LENKDIRLA- SAVLEVELHQ TSALSVPTCP   | DPGRLLTVKP                      |
| <i>H. glaber</i>      | -----MH LESKDSRAA- PAVQEVLEQR TSN---PSGA   | DPGGLEPPRP                      |
| <i>H. sapiens</i>     | MREDWQSMH LEGRDGRRY- PGAPAVELLQ TSV---PSG- | -----LAEL                       |
| <i>M. domestica</i>   | -----MY VENKGGVI- SRELEMELNQ TSALVHTNVH    | GHMGAESITD                      |
|                       | 51                                         | 100                             |
| <i>M. rufoniger</i>   | -----                                      | ---PYPQAT RQSCWAPVDQ DFGSFLTEQR |
| <i>M. davidii</i>     | AAISRRP--- --QLGGRGX- -----KQAA            | GQSCWAPVDQ DFGSFLTEQR           |
| <i>M. brandtii</i>    | -----                                      | ---PYPQAA GQSCWAPVDQ DFGSFLTEQR |
| <i>M. lucifugus</i>   | AAITRRP--- --QLGVRGAD PQGPYPQAAA           | GQSCWAPVDQ DFGSFLTEQR           |
| <i>E. fuscus</i>      | AASSRRP--- --QLGAGGAD PESPYPREAA           | GQSCWAPGDQ DCGSFLTEQR           |
| <i>P. alecto</i>      | --GSFGP--- --QYGASRTA PPGSYPSAAA           | QQNFGAPEDQ GLASFPMEQR           |
| <i>P. vampyrus</i>    | --GSFGP--- --QYRASKTA PPGSCPSAAA           | QQNFGAPEDQ GLASFPMEQS           |
| <i>R. aegyptiacus</i> | --GILGP--- --QHGASRAA PPDPCPSAEA           | KQSFVRPEDQ SFASFLMERR           |
| <i>B. taurus</i>      | NTSNRRP--- --QQGVGRAD SLSPYHNGAA           | GQSCWATVDQ DFGSFLKERR           |
| <i>E. caballus</i>    | VMSNCRP--- --QPGVSRAD PPSPCSSRAA           | RWSHWAPVDQ ELGPFLTEGR           |

|              |            |             |            |             |             |
|--------------|------------|-------------|------------|-------------|-------------|
| M. musculus  | ATSN-----  | ---YKLGQAD  | PCIPYAGEAA | GKSVCVPEHT  | EFGSFLVKGS  |
| H. glaber    | SSCEH----- | ---RG-HGAR  | LPGPRAGWAA | GQSPWTAGRK  | DVGSFLTERR  |
| H. sapiens   | VAGKRRL--- | --PRGAGGAD  | PSHSCPRGAA | GQSSWAPAGQ  | EFASFLTGR   |
| M. domestica | NFNELRLLKK | FHRIA AVHGE | PQESSPSGTE | ENDCC IPLDD | DFG PLLMQER |

101

150

|                |            |             |             |             |             |
|----------------|------------|-------------|-------------|-------------|-------------|
| M. rufoniger   | SHLPFTGFCS | SGPRDPCLTE  | STPLLGGPSQ  | ERGTRCLPVC  | HPELITA-ES  |
| M. davidii     | SRLPFTGFCS | SGPGDPCLTE  | STPLLGRPSQ  | ERGVRCPLVC  | HPELITA-ES  |
| M. brandtii    | SHLPFTGFCS | SGPREACCTE  | STPLLGGPSQ  | ERGARCLPVY  | HPELITA-ES  |
| M. lucifugus   | SHLPFTGFCS | SGPREACCTE  | STPLLGGPSQ  | ERGARCLPVC  | HPELITA-ES  |
| E. fuscus      | -----      | -----       | -----       | ---ARCLPVC  | RPELITA-ES  |
| P. alecto      | SHAPFLQAFS | -----PSLTE  | NTPLL RNASQ | GKG-----    | -----       |
| P. vampyrus    | SVKSVIATSI | -----D---I  | EL-----     | ---DLRIALG  | STEFKI--LK  |
| R. aegyptiacus | SHSPFLQAFS | -----PSLTE  | NTPLL RNASQ | GKGSRRMPAG  | GPEPAGPGAS  |
| B. taurus      | SHPPFSQVFS | SRSKEPCFTE  | NTPLL RNFSQ | EKGSWCMPVC  | HPEFITGEES  |
| E. caballus    | SHSPFIQFFS | SGSKDLCFTE  | NTPLL RNSSQ | EKGSRCMPVY  | HPEFI IAEES |
| M. musculus    | -----      | SSLKDL SFKE | DTPLLWNSSQ  | KKRSQ LMPVH | HPEFIATEGS  |
| H. glaber      | SHSPLPQFLG | SRTKDSCFTE  | NTPLLWNSSQ  | EKGSHCMPAY  | HPEFMPEEES  |
| H. sapiens     | SHSSLPQMSS | SRSKDSCFTE  | NTPLL RNLSQ | EKGSRCIPVY  | HPEFITAEES  |
| M. domestica   | SHFPSSKFFN | SRSKDNCFTE  | KTPLLKTFSE  | ENGLQCRTIP  | HSDFIMEDES  |

151

200

|                |            |            |             |            |            |
|----------------|------------|------------|-------------|------------|------------|
| M. rufoniger   | WDLSSAKWEG | TSLLGGEVAG | SSRSTSSDRG  | DV-----    | ---LEGAPVP |
| M. davidii     | WDLSSAEWEG | TSLLGSEATG | SSRSASSDRG  | DL-----    | ---LEGAPV- |
| M. brandtii    | WDLSSAEWEG | TSLLGSEAAG | SSRSASSDRG  | DL-----    | ---LEGAPVP |
| M. lucifugus   | WDLSSAEWEG | TSLLGSEAAG | SSRSASSDRG  | DL-----    | ---LEGAPVP |
| E. fuscus      | WDLGSAEWEG | RSLLGSEAAG | SSRSASSDRG  | DL-----    | ---LEGAPVP |
| P. alecto      | -----      | -----      | -----       | -----      | -----      |
| P. vampyrus    | YD-----    | -----      | -----       | -----VS    | CGF-----   |
| R. aegyptiacus | WESGCAEWDA | DARALPVGVP | GRRGRTPPQG  | RCAPRLQPRV | CSWKRLLAGQ |
| B. taurus      | WEDSSTEWEW | RSLLSRELAG | SSES AFLEKG | EL-----    | ---LDSAHR  |

|                     |                                                     |
|---------------------|-----------------------------------------------------|
| <i>E. caballus</i>  | WENSSAEWEP RSLLSRESTG SSGSTSLEKG EL----- ---LDGAFIR |
| <i>M. musculus</i>  | WENGLTAWEQ KCMLGKEVAD LSALASSEKR DL----- ---AGSVHLR |
| <i>H. glaber</i>    | WENSLAEWEP RCTLTGEGAG WSTPASSHKE EP----- ---TEGTHLR |
| <i>H. sapiens</i>   | WEDSSADWER RYLLSREVSG LSASASSEKG DL----- ---LDSPHIR |
| <i>M. domestica</i> | WDSTSSEWEQ RCLLGNEIVS FSTSASSEKS EF----- ---LDSFHVK |

201

250

|                       |                                                        |
|-----------------------|--------------------------------------------------------|
| <i>M. rufoniger</i>   | FRLSKLRRCA RRLKVTGLFV FVMFVSFS LYPDEGKLWQ LLAVSPLESY   |
| <i>M. davidii</i>     | -----SFS LYPDEGKLWQ LLAVSPLESY                         |
| <i>M. brandtii</i>    | FRLSKLRRCA RRLKVTGLFV FVMCSVSFS LYPDEGKLWQ LLAVSPLESY  |
| <i>M. lucifugus</i>   | FRLSKLRRCA RRLKVTGLFV FVMCSVSFS LYPDEGKLWQ LLAVSPLESY  |
| <i>E. fuscus</i>      | FRLSKLSPCW SL----- ----QVSFS LYPDEGRLWQ LLAVSPLESY     |
| <i>P. alecto</i>      | -----RCM QWLKVTGLFV FVVCTVSFS LYPDQGKSWQ LVAVSQLESY    |
| <i>P. vampyrus</i>    | ----- ---ATYG--- -YYYVEVSFS LYPDQGKSWQ LVAVSQLESY      |
| <i>R. aegyptiacus</i> | ARPKASRRCV QWLKVTGLFV FVVCTVSFS LYPDQGKSWQ LVAVSQLESY  |
| <i>B. taurus</i>      | FRLAKLRCCV QWLKVTGLFV FVVLCSILFS LYPDQGKLWQ LLAVSPLESY |
| <i>E. caballus</i>    | FRLSKLRRCV QWLKVAGLFA FVVCSILFS LYPDQGFQWQ LLAVSPLESY  |
| <i>M. musculus</i>    | AQVSKLGCCV RWIKITGLFV FVVLCSILFS LYPDQGFQWQ LLAVSPLENY |
| <i>H. glaber</i>      | VPVLKLKCCA RWLKVAGLFA FVVLCSILFS LYPDQGKSWQ LLAVSPLESY |
| <i>H. sapiens</i>     | LRLSKLRRCV QWLKVMGLFA FVVLCSILFS LYPDQGKLWQ LLALSPLENY |
| <i>M. domestica</i>   | FNLSKLRSCV RCLKVTGLFI FGVVCSILFS TYPDHGKSWQ MLAVSPLESY |

**Topological domain: Extracellular**

251

300

|                       |                                                        |
|-----------------------|--------------------------------------------------------|
| <i>M. rufoniger</i>   | SVNLSSRSDS TLLQVDLAGA LVAGGSSRPG REEHVVEVT QASAPGSR-R  |
| <i>M. davidii</i>     | SANLSSRSDS TLLQVDLAGA LMPGSPSRPG REEHVVEVT QAGAPSSR-R  |
| <i>M. brandtii</i>    | SANLSSRSDS TLLRVDLAGA LVAGGSPSRPG REEHVVEVT QAGAPGSR-R |
| <i>M. lucifugus</i>   | SANLSSRSDS TLLRVDLAGA LVAGGSPSRPG REERVVEVT QAGAPGSR-R |
| <i>E. fuscus</i>      | SANLSSRSDS TLLRVDLAGA LVAGGSPSRPG REEHVVEVT QASAPGSR-R |
| <i>P. alecto</i>      | SANLSGHPVL VTWGLSLT-- -----                            |
| <i>P. vampyrus</i>    | SANLSGHADS TLLQVDLAGA LAAGGPR-PE SAERVVEVT RTDAPGSRRR  |
| <i>R. aegyptiacus</i> | SANLSGHVDS TLLQVDLAGA LAAGGPG-PE NAERVVEVT WTDAPGSRRR  |



|              |            |            |            |            |            |
|--------------|------------|------------|------------|------------|------------|
| B. taurus    | SVNLSSHADS | MLLQVGLAGA | LVAGSPSHLG | REEHVMVEVT | QANTPGSRRR |
| E. caballus  | SVNLSSHVDS | ALLQVDLAGA | LVAGSSSRPG | REEHIVVEVT | QVDAPGSRWR |
| M. musculus  | SVNLSGHADS | MILQLDLAGA | LMAGGPSGSG | KEEHVVVVVT | QTDAAGNRRR |
| H. glaber    | SVNLSGHADS | TLLQLNLAGA | LAASGPSRSG | REEHVVEVT  | QRSALNSRWQ |
| H. sapiens   | SVNLSSHVDS | TLLQVDLAGA | LVASGPSRPG | REEHIVVELT | QADALGSRWR |
| M. domestica | SVNLTDVGDS | ALLKLELAGS | LIAGVVRPQ  | SEEVIVVEVI | LREELGFRRR |

**Topological domain: Extracellular**

301

350

|                |            |            |            |            |            |
|----------------|------------|------------|------------|------------|------------|
| M. rufoniger   | RPQ-QVTHNW | TVFLNPRRSE | HVVVSRTFEV | PSRDGVSISV | RAALQQPRAV |
| M. davidii     | WPQ-QVTHNW | TVFLDPRRSE | HVVVSRTFEV | PSRDGVSISV | RAALQQPRAV |
| M. brandtii    | RPQ-QVTHNW | TVFLDPRRSE | HVVVSRTFEV | PSRDGVSISV | RAALQQPRAV |
| M. lucifugus   | RPQ-QVTHNW | TVFLNPRRSD | HVVVSRTFEV | PSRDGVSISV | RAALQQPRAV |
| E. fuscus      | RPQ-QVTHNW | TVFLSPRRGE | HVVASRTFEV | PSRDGVSISV | RAALQQPRAV |
| P. alecto      | -----      | -----      | ---RAKAVAL | LCRETVSIRI | RASLQQTQLV |
| P. vampyrus    | RPQ-QVTQNW | TVFLNPRRRD | RLVVSRIFEV | PSRETVSIRI | RASLQQTQLV |
| R. aegyptiacus | RPQ-QATQNW | TVFLNPRRSD | RLVVSRTFEV | PSRETVSIRI | RASLQQTQLV |
| B. taurus      | RPQ-QVTHNW | TIFLNPSGSE | HVVVSRTFEV | LSREPVSISI | RASLQQTQIV |
| E. caballus    | RPQ-QVTHNW | TIFLNPRRNE | RSVVSRTFEV | LSRDTVSISI | RASLQQTPAI |
| M. musculus    | RPQ-QLTYNW | TVLLNPR-SE | HVVVSRTFEI | VSREAVSISI | QASLQQTRLV |
| H. glaber      | QPQ-QVTHNW | TVLLNPRRSE | HLEVSRTFTI | LSREAVSIRV | RTSFPQTRVV |
| H. sapiens     | RPQ-QVTHNW | TVYLNPRRSE | HSVMSRTFEV | LTRETVSISI | RASLQQTQAV |
| M. domestica   | RPQQQVIYNW | TIFLNSRRNE | RAVTSRTFEI | ITRETISINI | QAFLQENKVI |

**Topological domain: Extracellular**

351

400

|              |                         |            |            |            |            |
|--------------|-------------------------|------------|------------|------------|------------|
| M. rufoniger | PLLLAH <sup>H</sup> HLR | ASVEAQVTAA | AAILAGVYVL | IIFEIVHRTL | AAMLGSLAAL |
| M. davidii   | PLLLAHQHLR              | ASVEAQVTAA | AAILAGVYVL | IIFEIVHRTL | AAMLGSLAAL |
| M. brandtii  | PLLLAHQHLR              | ASVEAQVTAA | AAILAGVYVL | IIFEIVHRTL | AAMLGSLAAL |
| M. lucifugus | PLLLAHQHLR              | ASVEAQVTAA | AAILAGVYVL | IIFEIVHRTL | AAMLGSLAAL |
| E. fuscus    | PLLLAHQHLR              | ASVEAQVTMA | AVILAGVYVL | IIFEIVHRTL | AAMLGSLAAL |
| P. alecto    | PLMAHQHLR               | ASVGAQVTAA | AAILAGVYAL | IIFEIVHRTL | AAMLGALAAL |
| P. vampyrus  | PLLLAHQHLR              | ASVGAQVTAA | AAILAGVYAL | IIFEIVHRTL | AAMLGALAAL |

|                |            |            |            |            |            |
|----------------|------------|------------|------------|------------|------------|
| R. aegyptiacus | PLLMAHQHLR | ASVGAQVTAA | AAILAGVYAL | IIFEIVHRTL | AAMLGSLAAL |
| B. taurus      | PLLMTHQYLR | ASVEAQVTIA | AVILAGVYVL | IIFEIVHRTL | AAMLGSLSAL |
| E. caballus    | PLLMAHQYLR | ASVEAQVTIA | AVILAGVYVL | IIFEIVHRTL | AAMLGSLAAL |
| M. musculus    | PLLLAHQFLG | ASVEAQVASA | VAILAGVYTL | IIFEIVHRTL | AAMLGALAAL |
| H. glaber      | PLLLSLQYLR | ISFEAQVTMA | AAILAGVYTL | IIFEIVHRTL | AAMLGALAAL |
| H. sapiens     | PLLMAHQYLR | GSVETQVTIA | TAILAGVYAL | IIFEIVHRTL | AAMLGSLAAL |
| M. domestica   | PLSMTHQYLH | ADIETQVTIA | SVILAGVYML | IIFEIVHRTL | AAMLGSLAAL |

**Topological domain: Extracellular**

401

450

|                |            |            |            |            |            |
|----------------|------------|------------|------------|------------|------------|
| M. rufoniger   | AALAVTGDRP | SETQVVEWID | FETLALLFGM | MILVAIFSET | GFFDYCAVKA |
| M. davidii     | AALAVTGDRP | SLTHVVEWID | FETLALLFGM | MILVAIFSET | GFFDYCAVKA |
| M. brandtii    | AALAVTGDRP | SLTHVVEWID | FETLALLFGM | MILVAIFSET | GFFDYCAVKA |
| M. lucifugus   | AALAVTGDRP | SLNPRGEWID | FETLALLFGM | MILVAIFSET | GFFDYCAVKA |
| E. fuscus      | AALAVTGDRP | SLTHVVEWID | FETLALLFGM | MILVAIFSET | GFFDYCAVKA |
| P. alecto      | AVLAVMGDRP | SLARVVEWID | FETLALLFGM | MVLVAIFSET | GFFDYCAVKA |
| P. vampyrus    | AVLAVMGDRP | SLARVVEWID | FETLALLFGM | MVLVAIFSET | GFFDYCAVKA |
| R. aegyptiacus | AALAVMGDRP | SLARVVEWID | FETLALLFGM | MILVAIFSET | GFFDYCAVKA |
| B. taurus      | AALAVIGDRP | SLTHVVEWID | FETLALLFGM | MILVAIFSET | GFFDYCAVKV |
| E. caballus    | AVLAVIGDRP | SLTHVVEWID | FETLALLFGM | MILVAIFSET | GFFDYCAVKA |
| M. musculus    | AALAVGDRP  | SLTHVVEWID | FETLALLFGM | MILVAVFSET | GFFDYCAVKA |
| H. glaber      | AALAVIGDRP | SLTQVVEWID | FETLTLFGM  | MILVAIFSET | GFFDYCAVKA |
| H. sapiens     | AALAVIGDRP | SLTHVVEWID | FETLALLFGM | MILVAIFSET | GFFDYCAVKA |
| M. domestica   | AALAVIGDRP | SLVRVVEWID | YETLALLFGM | MILVAIFSET | GFFDYCAVKA |

**Topological domain: Extracellular**

451

500

|              |            |            |            |            |            |
|--------------|------------|------------|------------|------------|------------|
| M. rufoniger | YRLSRGRVWA | MIIMLCLFAA | VLSAFLDNVT | TALLFTPVTI | RLCEVLNLDP |
| M. davidii   | YRLSRGRVWA | MIIMLCLFAA | VLSAFLDNVT | TSLLFTPVTI | RLCEVLNLDP |
| M. brandtii  | YRLSRGRVWA | MIIMLCLFAA | VLSAFLDNVT | TSLLFTPVTI | RLCEVLNLDP |
| M. lucifugus | YRLSRGRVWA | MIIMLCLFAA | VLSAFLDNVT | TSLLFTPVTI | RLCEVLNLDP |
| E. fuscus    | YRLSRGRVWA | MIIMLCLIAA | VLSAFLDNVT | TSLLFTPVTI | RLCEVLNLDP |
| P. alecto    | YRLSRGRVWA | MTIMLCLVAA | TLSAFLDNVT | TSLLFTPVTI | RLCEVLNLDP |

|                       |            |            |            |            |            |
|-----------------------|------------|------------|------------|------------|------------|
| <i>P. vampyrus</i>    | YRLSRGRVWA | MTIMLCLVAA | TLSAFLDNVT | TSLLFTPVTI | RLCEVLNLDP |
| <i>R. aegyptiacus</i> | YRLSRGRVWA | MTIMLCLVAA | TLSAFLDNVT | TSLLFTPVTI | RLCEVLNLDP |
| <i>B. taurus</i>      | YQLSRGRVWT | MIFMLCLVAA | VLSAFLDNVT | TVLLFTPVTI | RLCEVLNLDP |
| <i>E. caballus</i>    | YQLSRGRVWA | MIIMLCLIAA | ILSAFLDNVT | TSLLFTPVTI | RLCEVLNLDP |
| <i>M. musculus</i>    | YQLSRGRVWA | MIFMLCLMAA | ILSAFLDNVT | TMLLFTPVTI | RLCEVLNLDP |
| <i>H. glaber</i>      | YRLSRGRVWA | MIIMLCLIAA | VLSAFLDNVT | TMLLFTPVTI | RLCEVLNLDP |
| <i>H. sapiens</i>     | YRLSRGRVWA | MIIMLCLIAA | VLSAFLDNVT | TMLLFTPVTI | RLCEVLNLDP |
| <i>M. domestica</i>   | YRLSRGRVWA | MIILCLFAA  | FLSAFLDNVT | TMLLFTPVTI | RLCEVLNLDP |

501

550

|                       |            |            |            |            |            |
|-----------------------|------------|------------|------------|------------|------------|
| <i>M. rufoniger</i>   | RQVLIAEVIF | TNIGGAATAI | GDPPNVMIVS | NQELRKTGLD | FAG--FTAHM |
| <i>M. davidii</i>     | RQVLIAEVIF | TNIGGAATAI | GDPPNVMIVS | NQELRKMGLD | FAG--FTAHM |
| <i>M. brandtii</i>    | RQVLIAEVIF | TNIGGAATAI | GDPPNVMIVS | NQELRKMGLD | FAG--FTAHM |
| <i>M. lucifugus</i>   | RQVLIAEVIF | TNIGGAATAI | GDPPNVMIVS | NQELRKMGLD | FAG--FTAHM |
| <i>E. fuscus</i>      | RQVLIAEVIF | TNIGGAATAI | GDPPNVIIS  | NQELRKMGLD | FAG--FTAHM |
| <i>P. alecto</i>      | RHVLIAEVIF | TNIGGAATAI | GDPPNVIIVS | NQELREAGLD | FAS--FTAHM |
| <i>P. vampyrus</i>    | RHVLIAEVIF | TNIGGAATAI | GDPPNVIIVS | NQELREAGLD | FAS--FTAHM |
| <i>R. aegyptiacus</i> | RHVLIAEVIF | TNIGGAATAI | GDPPNVIIVS | NQELREAGLD | FAG--FTAHM |
| <i>B. taurus</i>      | RQVLIAEVIF | TNIGGAATAI | GDPPNVLIVS | NQELRKMVCI | TIIRLFPINI |
| <i>E. caballus</i>    | RQVLIAEVIF | TNIGGAATAI | GDPPNVIIVS | NQELRKMGLD | FAG--FTAHM |
| <i>M. musculus</i>    | RQVLIAEVIF | TNIGGAATAI | GDPPNVIIVS | NQELRKMGLD | FAG--FTAHM |
| <i>H. glaber</i>      | RQVLIAEVIF | TNIGGAATAI | GDPPNVIIVS | NQELRKMGLD | FAR--FTAHM |
| <i>H. sapiens</i>     | RQVLIAEVIF | TNIGGAATAI | GDPPNVIIVS | NQELRKMGLD | FAG--FTAHM |
| <i>M. domestica</i>   | RHVLIAEVIF | TNIGGAATAV | GDPPNVIIVS | NQELRKTGMD | FAG--FTAHM |

551

600

|                     |            |           |          |       |       |
|---------------------|------------|-----------|----------|-------|-------|
| <i>M. rufoniger</i> | FVGICFVLLF | SF--PLLRL | YWN----- | ----- | ----- |
| <i>M. davidii</i>   | FVGICFVLLF | SF--PLLRL | YWN----- | ----- | ----- |
| <i>M. brandtii</i>  | FVGICFVLLF | SF--PLLRL | YWN----- | ----- | ----- |
| <i>M. lucifugus</i> | FVGICFVLLF | SF--PLLRL | YWN----- | ----- | ----- |
| <i>E. fuscus</i>    | FVGICFVLLF | SF--PLLRL | FWN----- | ----- | ----- |

|                |            |            |            |            |            |
|----------------|------------|------------|------------|------------|------------|
| P. alecto      | FVGICLVLLF | CF--PLLRL  | YWN-----   | -----      | -----      |
| P. vampyrus    | FVGICLVLLF | CF--PLLRL  | YWN-----   | -----      | -----      |
| R. aegyptiacus | FVGICFVLLF | CV--PLLRL  | YWN-----   | -----      | -----      |
| B. taurus      | EPSL-LAHLV | TFYQHGYHFL | LWSVLGHLES | GRLGRQHAIQ | TKEDPELRDH |
| E. caballus    | FVGICFVLLF | SF--PLLRL  | YWN-----   | -----      | -----      |
| M. musculus    | FLGICLVLLV | SF--PLLRL  | YWN-----   | -----      | -----      |
| H. glaber      | FVGICLVLLV | SF--PLLRL  | YWN-----   | -----      | -----      |
| H. sapiens     | FIGICLVLLV | CF--PLLRL  | YWN-----   | -----      | -----      |
| M. domestica   | FIGICLILLV | SF--PFLRL  | YCN-----   | -----      | -----      |

Topological domain: Extracellular

|                | 601        | 650                                         |
|----------------|------------|---------------------------------------------|
| M. rufoniger   | -----      | -----R KLYNKEPSEI                           |
| M. davidii     | -----      | -----R KLYNKEPSEI                           |
| M. brandtii    | -----      | -----R KLYNKEPSEI                           |
| M. lucifugus   | -----      | -----R KLYNKEPSEI                           |
| E. fuscus      | -----      | -----R KLYNKEPSEI                           |
| P. alecto      | -----      | -----E KLYNKEPSDI                           |
| P. vampyrus    | -----      | -----E KLYNKEPSDI                           |
| R. aegyptiacus | -----      | -----K KLYNKEPSEV                           |
| B. taurus      | MSHNHSHMGK | HRKHLGGQAM RVACITTGST WTAVTQGTLG KLLKPQLSFP |
| E. caballus    | -----      | -----K KLYNKEPSEI                           |
| M. musculus    | -----      | -----K KLYNKEPSEI                           |
| H. glaber      | -----      | -----K KLYNKEPSEI                           |
| H. sapiens     | -----      | -----R KLYNKEPSEI                           |
| M. domestica   | -----      | -----K KLYNKEPSEI                           |

Topological domain: Extracellular

|              | 651        | 700                                         |
|--------------|------------|---------------------------------------------|
| M. rufoniger | VELKHESVSV | -----FHF                                    |
| M. davidii   | VGECAS---- | -----SFCF                                   |
| M. brandtii  | VELKHESVSF | -----FHF                                    |
| M. lucifugus | VELKHEIHVW | RLTAQRISPA SREETAVRGL LLGKVLALER LLARRLHTFH |

|                |                                                         |
|----------------|---------------------------------------------------------|
| E. fuscus      | VELKHEIHVW RLTAQRISPA SREETAVRGL LLGKVLALER LLARRLHSFH  |
| P. alecto      | VELKHEIHVW RLTAQRISPA SREETAVRGL LLQKVLALEH LLARRLRTFH  |
| P. vampyrus    | VELKHEIHVW RLTAQRISPA SREETAVRGL LLHKVLALEH LLARRLRTFH  |
| R. aegyptiacus | VELKHEIHVW RLTAQRISPA SREETAVREL LLRKVLALEH LLARRLRTFH  |
| B. taurus      | AELKHEIHVW RLTAQHISPA SREETAVRGM LLEKVLTLLEH LLAQRLHSFH |
| E. caballus    | VELKHEIHVW RLTAQRISPA SREETAVRDL LLGKVLALER LLACRLRTFH  |
| M. musculus    | VELKHEIHVW RLTAQRISPA SREETAVRGL LLEKVLALEH LLAQRLHTFH  |
| H. glaber      | VELKHEIHVW RLTAQRISPA SREETAVRSL LLQKVLALEH LLARRLHTFR  |
| H. sapiens     | VELKHEIHVW RLTAQRISPA SREETAVRRL LLGKVLALEH LLARRLHTFH  |
| M. domestica   | VELKHEIHVW KLTAQRINPA SREETAVKCL LMQKVLTLLEF LLKKKLTQFQ |

Topological domain: Extracellular

701

750

|                |                                                        |
|----------------|--------------------------------------------------------|
| M. rufoniger   | RQISQEDKNW ETNIQELQKK HRIADRVLLA KCLMVLGFVI CMFFLNSFVL |
| M. davidii     | RQISQEDKNW ETNIQELQKK HRIADRVLLA KCLMVLGFVI CMFFLSSFVP |
| M. brandtii    | RQISQEDKNW ETNIQELQKK HRISDRVLLA KCLMVLGFVI CMFFLNSFVP |
| M. lucifugus   | RQISQEDKNW ETNIQELQKK HRISDRVLLA KCMVVLGFVI CMFFLNSFVP |
| E. fuscus      | RQISQEDKNW ETNIQELQKK HRISDGILLA KCLVVLGFVI FMFFLNSFVP |
| P. alecto      | RQISREDKNW ETNIQELQRK HRVSDGVLLA KCLLVGLVI LMFFFSSFVP  |
| P. vampyrus    | RQISREDKNW ETNIQELQRK RRKRI----- -CT                   |
| R. aegyptiacus | RQISREDKNW EANIQELQRK HRISDGALLA KCLLVGLVI LMFFLSSLVP  |
| B. taurus      | RQISQEDKNW ETNIQELQRK HRISDKILLA KCLTVLVFVI FMFFLNSFVP |
| E. caballus    | RQISQEDKNW ETNIQELQKK HRISNRILLA KCLMVLGFVI FMFFLNSFVP |
| M. musculus    | RQISQEDKNW ETNIQELQRK HRISDRSLLV KCLTVLGFVI SMFFLNSFVP |
| H. glaber      | RQISQEDKNW ETNIQELQRK HRISDRILLV KCLTVLGFVI FTFFLSSFVP |
| H. sapiens     | RQISQEDKNW ETNIQELQKK HRISDGILLA KCLTVLGFVI FMFFLNSFVP |
| M. domestica   | RQISQEDKNW ETNIQELQKK HRIADKILLI KCLTVLGFVI FMFFLNSFVP |

Topological domain: Extracellular

751

800

|              |                                                         |
|--------------|---------------------------------------------------------|
| M. rufoniger | AVHLDLGWIA MLGAIWLLIL ADIHDFEVIL HRVEWATLLF FAALFVLM EA |
| M. davidii   | AVHLDLGWIA ILGAIWLLIL ADVHDFEVIL HRVEWATLLF FAALFVLM EA |
| M. brandtii  | AVHLDLGWIA ILGAIWLLIL ADVHDFEVL HRVEWATLLF FAALFVLM EA  |

|                |            |            |            |            |            |
|----------------|------------|------------|------------|------------|------------|
| M. lucifugus   | AVHLDLGWIA | ILGAIWLLIL | ADVHDFEVVL | HRVEWATLLF | FAALFVLMEA |
| E. fuscus      | AVHLDLGWIA | ILGAIWLLIL | ADIHDFEII  | HRVEWATLLF | FAALFVLMEA |
| P. alecto      | GVHLGLGWIA | VLGAIWLLIL | ADIHEFEIVL | HRVEWATLLF | FAALFVLMEA |
| P. vampyrus    | RISRSPGWIA | VLGAIWLLIL | ADIHEFEIVL | HRVEWATLLF | FAALFVLMEA |
| R. aegyptiacus | GVHLGLGWIA | VLGAIWLLIL | ADIHEFEIIL | HRVEWATLLF | FAALFVLMEA |
| B. taurus      | GVHLDLGWIA | ILGAIWLLIL | ADIHDFEII  | HRVEWATLLF | FAALFVLMEA |
| E. caballus    | GVHLDLGWIA | ILGAIWLLIL | ADIHDFEII  | HRVEWATLLF | FAALFVLMEA |
| M. musculus    | GIHLDLGWIA | ILGAIWLLIL | ADIHDFEII  | HRVEWATLLF | FAALFVLMEA |
| H. glaber      | GIHLDLGWIA | ILGAIWLLIL | AEVHDFEII  | HRVEWATLLF | FAALFVLMEA |
| H. sapiens     | GIHLDLGWIA | ILGAIWLLIL | ADIHDFEII  | HRVEWATLLF | FAALFVLMEA |
| M. domestica   | GIHLDLGWIA | ILGAIWLLVL | ADIHDFEII  | HRVEWATLLF | FAALFVLMEA |

**Transmembrane: Helical**

801

850

|                |            |            |            |            |            |
|----------------|------------|------------|------------|------------|------------|
| M. rufoniger   | LGHLHLIEYV | GEQTSLIKM  | VPEDRRLAAA | IVLVVWVSAI | ASSLIDNIPF |
| M. davidii     | LGHLHLIEYV | GEQTSLIKM  | VPEDQRLAAA | IVLVVWVSAI | ASSLIDNIPF |
| M. brandtii    | LGHLHLIEYV | GEQTSLIKM  | VPEDRRLAAA | IVLVVWVSAI | ASSLIDNIPF |
| M. lucifugus   | LGHLHLIEYV | GEQTSLIKM  | VPEDRRLAAA | IVLVVWVSAI | ASSLIDNIPF |
| E. fuscus      | LGHLHLIEYV | GEQTSLIKM  | VPEDRRLAAA | IVLVVWVSAI | ASSLIDNIPF |
| P. alecto      | LAHLHLIEYV | GEQTSLIKM  | VPEDRRLAAA | IVLVWVSAT  | ASSLIDNIPF |
| P. vampyrus    | LAHLHLIEYV | GEQTSLIKM  | VPEDRRLAAA | IVLVWVSAT  | ASSLIDNIPF |
| R. aegyptiacus | LAHLHLIEYV | GEQTLLIKM  | VPEDRRLAAA | IVLVWVSAA  | ASSLIDNIPF |
| B. taurus      | LAHLHLIEYV | GEQTALLIKM | VPEDQRLTAA | IILVVWVSGI | TSSLIDNIPF |
| E. caballus    | LAHLHLIEYV | GEQTALLIKM | VPEDRRLAAA | IILVIWVSAI | ASSLIDNIPF |
| M. musculus    | LTHLHLVEYV | GEQTALLIKM | VPEDQRFAAA | IVLIVWVSAL | ASSLIDNIPF |
| H. glaber      | LAHLHLIEYV | GEQTALLIKM | VPEDRRLAAA | MVLVMWVSAL | ASSLIDNIPF |
| H. sapiens     | LAHLHLIEYV | GEQTALLIKM | VPEEQRLIAA | IVLVWVSAL  | ASSLIDNIPF |
| M. domestica   | LAHLHLIEYI | GEQTALLIKM | VPEDQRLTAA | IILVVWISAL | ASSLIDNIPF |

851

900

|              |           |         |            |            |            |
|--------------|-----------|---------|------------|------------|------------|
| M. rufoniger | TATM----- | -----IP | VLLNLSQDPE | VSLPAPPLMY | ALALGACLGG |
| M. davidii   | TATM----- | -----IP | VLLNLSQDPE | VSLPAPPLMY | ALALGACLGG |

M. brandtii TATM-----IP VLLNLSQDPE VSLPAPPLMY ALALGACLGG  
M. lucifugus TATM-----IP VLLNLSQDPE VSLPAPPLMY ALALGACLGG  
E. fuscus TATM-----IP VLLNLSQDPE VSLPAPPLMY ALALGACLGG  
P. alecto TATM-----VP VLLNLSRDPE VSLPAPPLMY ALAFGACLGE  
P. vampyrus TATM-----KS PP-----S QALSVT-----  
R. aegyptiacus TATM-----VP VLLSLSRDPE VRLPTPPLMY ALALGACLGG  
B. taurus TATM-----IP VLLNLSRDPE VSLPAPPLMY ALALGACLGG  
E. caballus TATM-----IP VLLNLSQDPE VSLPAPPLMY ALALGACLGG  
M. musculus TATM-----IP VLLNLSQDPE ISLPALPLMY ALALGACLGG  
H. glaber TATM-----IP VLLSLSQDPE VSLPALPLMY ALALGACLGG  
H. sapiens TATMIDTSYL RIHQLVLKIP VLLNLSHDPE VGLPAPPLMY ALAFGACLGG  
M. domestica TATM-----IP VLLNLSQDPE VSLPVKPLIF SLAIGACLGG

901

950

M. rufoniger NGTLIGASA-----NVVCAG-  
M. davidii NGTLIGASA-----NVVCAG-  
M. brandtii NGTLIGASA-----NVVCAG-  
M. lucifugus NGTLIGASA-----NVVCAG-  
E. fuscus NGTLIGASA-----NVVCAG-  
P. alecto LFVVVDAQVF VGQKQTENRL NVHWQNVETE KDGHGPEHAR RPRRVCRRG  
P. vampyrus -----  
R. aegyptiacus NGTLIAASA-----NVVCAG-  
B. taurus NGTLIGASA-----NVVCAG-  
E. caballus NGTLIGASA-----NVVCAG-  
M. musculus NGTLIGAST-----NVVCAG-  
H. glaber NGTLIGASA-----NVVCAG-  
H. sapiens NGTLIGASA-----NVVCAG-  
M. domestica NGTLIGASA-----NVVCAG-

951

1000

M. rufoniger -----

M. davidii -----  
M. brandtii -----  
M. lucifugus -----  
E. fuscus -----  
P. alecto GPGGTRRPSD LSSPFGQLSF VLGDGPAPPE PRLPSSFLTL AGATRSQITI  
P. vampyrus -----  
R. aegyptiacus -----  
B. taurus -----  
E. caballus -----  
M. musculus -----  
H. glaber -----  
H. sapiens -----  
M. domestica -----

1001

1046

M. rufoniger --IAEQHGYG FSFMQFFRLG FPMMVVSCMV ATCYLLVVHV VMGWN-  
M. davidii --IAEQHGYG FSFVQFFRLG FPMMVVSCMV AMCYLLVVHV VMGWN-  
M. brandtii --IAEQHGYG FSFMQFFRLG FPMMVVSCMV AMCYLLVVHV VMGWS-  
M. lucifugus --IAEQHGYG FSFMQFFRLG FPMMVVSCTV AMCYLLVVHV VMGWS-  
E. fuscus --IAEQHGYG FSFVEFFRLG FPMMVVSCMV AMCYLLVVHV VMGWN-  
P. alecto GYPPSQALSV TPGQFLFWLG FPMVVVSCTV GMCYLLVVHV VMGWS-  
P. vampyrus ----- -PGQFLFWLG FPMVVVSCTV GMCYLLVVHV VMGWS-  
R. aegyptiacus -I-AEQRYG FSFLQFFRLG FPMVIVSCTV GMCYLLVVHV VMGWS-  
B. taurus --IAEQHGYG FSFMEFFRLG FPMMVVSCMV GMCYLLVAHI VMGWN-  
E. caballus --IAEQHGYG FSFMEFFRLG FPMMVVSCTV GMCYLLVAHV VLGWN-  
M. musculus --IAEKHGYG FSFMEFFRLG FPMVMSCTI GMCYLLIAHI VVGWN-  
H. glaber --IAEQHGYG FSFMEFFRLG FPMVIVSCTV GMCYLLVVHV VMGWN-  
H. sapiens --IAEQHGYG FSFMEFFRLG FPMVVSCTV GMCYLLVAHV VVGWN-  
M. domestica --IAEQHGYG FSFMEFFRLG FPMMLVSCTI GMCYLLVAHV VVGWNS

Transmembrane: Helical
