# Supplementary material for: Myotis rufoniger genome sequence and analyses: M. rufoniger’s genomic feature and the decreasing effective population size of Myotis bats
Source: PubMed Central journal article supplement (PMC5498047; doi:10.1371/journal.pone.0180418), 2017-07-05
Supplement: pone.0180418.s007.pdf [file pone.0180418.s007.pdf]

*N6AMT1*

|                | 1          |            |            |            | 50         |
|----------------|------------|------------|------------|------------|------------|
| M. rufoniger   | -----      | -----      | -----      | -----      | -----      |
| M. davidii     | -----      | -----      | -----      | -----      | -----      |
| M. brandtii    | -----      | -----      | -----      | -----      | -----      |
| M. lucifugus   | MGVPAAARVP | EGPEARSAGQ | VTPEAVTALP | GSRSEGAGVR | VSVPELRALR |
| E. fuscus      | -----      | -----      | -----      | -----      | -----      |
| P. alecto      | -----      | -----      | -----      | -----      | -----      |
| P. vampyrus    | -----      | -----      | -----      | -----      | -----      |
| R. aegyptiacus | -----      | -----      | -----      | -----      | -----      |
| B. taurus      | -----      | -----      | -----      | -----      | -----      |
| E. caballus    | -----      | -----      | -----      | -----      | -----      |
| M. musculus    | -----      | -----      | -----      | -----      | -----      |
| H. glaber      | -----      | -----      | -----      | -----      | -----      |
| H. sapiens     | -----      | -----      | -----      | -----      | -----      |
| M. domestica   | -----      | -----      | -----      | -----      | -----      |

|                | 51         |            |            |            | 100        |
|----------------|------------|------------|------------|------------|------------|
| M. rufoniger   | -----      | -----MPS   | SGLAGVYPYY | QGTQVHATXE | DTFLLLDXLE |
| M. davidii     | -----      | -----      | -----      | -----      | -----      |
| M. brandtii    | -----      | -----      | -----      | -----      | -----      |
| M. lucifugus   | AAFPGGLSAP | APPNSLPRGS | ATRPG---SG | AAPPTYPE-  | -----AP    |
| E. fuscus      | -----MAAP  | ----SLPTPE | HGHVG---RG | AFREYAPAE  | DTFLLLDALE |
| P. alecto      | -----      | MAAPRFPTPL | HGHVG---RG | AFNDVYEPAE | DTFLLLDALE |
| P. vampyrus    | -----      | MAAPRFPTPL | HGHVG---RG | AFSDVYEPAE | DTFLLLDALE |
| R. aegyptiacus | -----      | MAAPRFPTPL | HGHVG---RG | TFSDVYEPAE | DTFLLLDALE |
| B. taurus      | -----      | MAAPSFPTPL | HGHVG---RG | DFSDVYEPAE | DTFLLLDALE |
| E. caballus    | -----      | MAALGLPTPL | HGHVG---RG | AFSDVYEPAE | DTFLLLDALE |
| M. musculus    | -----      | MAAPSVPTPL | YGHVG---RG | AFRDVYEPAE | DTFLLLDALE |
| H. glaber      | -----      | MAARSFPTPL | HGHVG---RG | EFSDVYEPAE | DTFLLLDALE |

H. sapiens ----- MAGENFATPF HGHVG---RG AFSDVYEPAE DTFLLDDALE  
M. domestica -----MAARC RTPPRFPTPL HRHVG---QG AFREVYEPAE DTFLLDDALE

101

150

M. rufoniger XXXAELMQVE LCLEVGSGSG VVSXLLAFMI GPQALYMCTD INPKAAAF<sup>H</sup>TL  
M. davidii -----MI GPQALYLCTD INPEAAACTL  
M. brandtii -----MI GPQALYMCTD INPKAAACTL  
M. lucifugus RPRGPNRKVE LCLEVGSGSG VVSTFLASMI GPQALYMCTD INPKAAACTL  
E. fuscus AAAAELMRVE LCLEVGSGSG VVSAFLASMI GPRALYVCTD INPNAAACTL  
P. alecto AAVTEFKGVE ICLEVGSGSG VVSAFLATMI GPQVLYMCTD INPNAAVCTL  
P. vampyrus AAVTEFKGVE ICLEVGSGSG VVSAFLATMI GPQVLYMCTD INPNAAVCTL  
R. aegyptiacus AAVAELKGVE ICLEVGSGSG VVSAFLATMI GPQALYMCTD INPNAVACTL  
B. taurus AAAAELTGVE ICLEVGSGSG VVSAFLASVI GPQALYMCTD VNPEAAACTL  
E. caballus AAAAEFTGVE ICLEVGSGSG VVSAFLASMI GPQALYMCTD INPEAAACTL  
M. musculus AAAAELAGVE ICLEVGAGSG VVSAFLASMI GPRALYMCTD INPEAAACTL  
H. glaber AAAPELAGVE ICLEVGSGSG VVSVFLASMI GPQALYMCTD VNPEAAACTL  
H. sapiens AAAAELAGVE ICLEVGSGSG VVSAFLASMI GPQALYMCTD INPEAAACTL  
M. domestica AAAAELMGVE ICLEIGSGSG VVSAFLASII GPQALYMCTD INPKAADCTL

151

200

M. rufoniger EI<sup>H</sup>ACCNRVHV HPVI<sup>H</sup>TDLVKG LLPRLKEKVD LLVFNPPYVW TL<sup>H</sup>PEE-----  
M. davidii ETARCNRVHV HPVITDLVKG LLPRLKEKVD LLVFNPPYVW TPPEE-----  
M. brandtii ETARCNRVHV HPVITDLVKG LLPRLKEKVD LLVFNPPYVW TPPEEDIMRQ  
M. lucifugus ETARCNRVHV HPVITDLVKG LLPRLKEKVD LLVFNPPYVW TPPEE-----  
E. fuscus ETARCNRVHV QPVITDLVKG LLPRLKEKVD LLVFNPPYVW TPPEE-----  
P. alecto ETARCNRVHI QPIITDLVNG LLPRLKEKVD LLVFNPPYVW TPPEE-----  
P. vampyrus ETARCNRVHI QPIITDLVNG LLPRLKEKVD LLVFNPPYVW TPPEE-----  
R. aegyptiacus ETARCNRVHI QPIITDLVNG LLPRLKEKVD LLVFNPPYVW TPPEE-----  
B. taurus ETARCNRVHI QPIITDLVKG LLPRLKESVD LLVFNPPYVW TPPEE-----  
E. caballus ETARCNSVHI QPVITDLVKG LLPRLKGNVD LLVFNPPYVW TPPEE-----  
M. musculus ETARCNRVHV QPVITDLVHG LLPRLKGGVD LLVFNPPYVW TPPEE-----

|                     |                                                        |
|---------------------|--------------------------------------------------------|
| <i>H. glaber</i>    | ETAHCNRVHI QPVITDLVKG LLPRLKEKVD LLVFNPPYVW TPPEE----- |
| <i>H. sapiens</i>   | ETARCNKVHI QPVITDLVKG LLPRLTEKVD LLVFNPPYVW TPPQE----- |
| <i>M. domestica</i> | ETALCNKVHI QPIITDLAKG LLPRLFSKVD LLVFNPPYVW TPSEE----- |

201

250

|                       |                                                        |
|-----------------------|--------------------------------------------------------|
| <i>M. rufoniger</i>   | ----- --VGSHGT EAAWXGGRNG REVMDRFFPL                   |
| <i>M. davidii</i>     | ----- --VGSHGI EAAWAGGRNG REVMDRFFPL                   |
| <i>M. brandtii</i>    | WVQEKKEIMK IRNLEVISGR HNIPVGSYGI EAAWAGGRNG REVMDRFFPL |
| <i>M. lucifugus</i>   | ----- --VGSHGI EAAWAGGRNG REVMDRFFPL                   |
| <i>E. fuscus</i>      | ----- --VGSHGI EAAWAGGRNG REVMDRFFPL                   |
| <i>P. alecto</i>      | ----- --VGSHGI EAAWAGGRNG REVMDRFFPL                   |
| <i>P. vampyrus</i>    | ----- --VGSHGI EAAWAGGRNG REVMDRFFPL                   |
| <i>R. aegyptiacus</i> | ----- --VGSHGI EAAWAGGRNG REVMDRFFPL                   |
| <i>B. taurus</i>      | ----- --VGSYGI QAAWAGGRNG REVIDRFLPL                   |
| <i>E. caballus</i>    | ----- --VGSHGI EAAWAGGRNG REVMDRFFPL                   |
| <i>M. musculus</i>    | ----- --VGSYGI EAAWAGGRNG REVMDRFFPL                   |
| <i>H. glaber</i>      | ----- --VGSHGI EAAWAGGRNG REVMDRFFPL                   |
| <i>H. sapiens</i>     | ----- --VGSHGI EAAWAGGRNG REVMDRFFPL                   |
| <i>M. domestica</i>   | ----- --VGSHGI EAAWAGGRNG REVMDRFFPL                   |

251

300

|                       |                                                       |
|-----------------------|-------------------------------------------------------|
| <i>M. rufoniger</i>   | VPDLFSPRGL LYLVTIKENN PEDILETMKV RGLQGTALS RRAGQEILSV |
| <i>M. davidii</i>     | VPDLSRGL FYLVTIKEND PEDILETMKV RGLQGTALS RRAGQELLSV   |
| <i>M. brandtii</i>    | VPDLSRGL FYLVTIKENN PEDILETMKV RGLQGTALS RRAGQEILSV   |
| <i>M. lucifugus</i>   | VPDLSRGL FYLVTIKENN PEDILETMKV RGLQGTALS RRAGQELLSV   |
| <i>E. fuscus</i>      | VPDLSRGLV FYLVTIKENN PEDILETMKV KGLQGTALS RRAGQEVLSV  |
| <i>P. alecto</i>      | APDLSRGLS FYLVTIKENH PEEILKTMKM KGLQGTAVLC RQAGQETLSV |
| <i>P. vampyrus</i>    | APDLSRGLS FYLVTIKENH PEEILKTMKI KGLQGTAVLC RQAGQETLSV |
| <i>R. aegyptiacus</i> | ALDLSRGLS FYLVTIKENH PEEILKTMKM KGLQGTALC RQAGQETLSV  |
| <i>B. taurus</i>      | APDLSRGL FYLVTIKENN PEEILKIMKT KGLQGTAVLS RQAGQEMLSV  |
| <i>E. caballus</i>    | VPDLSRGL FYLVTIKENN PEEILKTMKT KGLQGTALS RQAGQELLSI   |

|                     |                                                        |
|---------------------|--------------------------------------------------------|
| <i>M. musculus</i>  | APELLSPRGL FYLVTVKENN PEEIFKTMKT RGLQGTTALC RQAGQEALSV |
| <i>H. glaber</i>    | ASDLLSPRGL FYLVTIKENN PEEILKTLKT KGLHGTTALS RQAGQEILSV |
| <i>H. sapiens</i>   | VPDLLSPRGL FYLVTIKENN PEEILKIMKT KGLQGTTALS RQAGQETLSV |
| <i>M. domestica</i> | AADLLSREGF FYLVAIKENN PDEIMETMKK YGLHGITVLS RQAGGETLSV |

301                    315

|                       |                  |
|-----------------------|------------------|
| <i>M. rufoniger</i>   | LMFTKFSHSV CSTLY |
| <i>M. davidii</i>     | LRFTKSSHSV CSTLY |
| <i>M. brandtii</i>    | LRFTKSSHSV CSTLY |
| <i>M. lucifugus</i>   | LRFTKSSHSV CSTLY |
| <i>E. fuscus</i>      | LRFTKSSHSV CSTLQ |
| <i>P. alecto</i>      | LKFTKS----       |
| <i>P. vampyrus</i>    | LKFTKS----       |
| <i>R. aegyptiacus</i> | LKFTKS----       |
| <i>B. taurus</i>      | LKFTKS----       |
| <i>E. caballus</i>    | LKFTRSSHTG GAP-- |
| <i>M. musculus</i>    | LRFSKS----       |
| <i>H. glaber</i>      | LKFTKC----       |
| <i>H. sapiens</i>     | LKFTKS----       |
| <i>M. domestica</i>   | LKFNKC----       |
